# Supplementary material for: Antibacterial spirooxindole alkaloids from Penicillium brefeldianum inhibit dimorphism of pathogenic smut fungi
Source: PubMed Central journal article supplement (PMC9702524; doi:10.3389/fmicb.2022.1046099), 2022-11-14
Supplement: Data_Sheet_1.pdf [file Data_Sheet_1.pdf]

## **Supporting Information**

### **Antibacterial Spirooxindole Alkaloids from *Penicillium brefeldianum***

### **Inhibit Dimorphism of Pathogenic Smut Fungi**

Huajun Shi<sup>1,#</sup>, Jinyan Jiang<sup>1,2#</sup>, Hang Zhang<sup>1,#</sup>, Haimei Jiang<sup>1</sup>, Zijie Su<sup>1</sup>, Dandan Liu<sup>3</sup>,  
Ligang Jie<sup>1,3</sup>, Fei He<sup>1,3\*</sup>

## Table of content

| No. | Content                                                                                                                       | Page |
|-----|-------------------------------------------------------------------------------------------------------------------------------|------|
| 1   | <b>Figure S1</b> <sup>1</sup> H NMR spectrum of spirobrefeldin A ( <b>1</b> , 600 MHz, DMSO- <i>d</i> <sub>6</sub> )          | 4    |
| 2   | <b>Figure S2</b> <sup>13</sup> C NMR spectrum of spirobrefeldin A ( <b>1</b> , 150 MHz, DMSO- <i>d</i> <sub>6</sub> )         | 5    |
| 3   | <b>Figure S3:</b> <sup>1</sup> H- <sup>1</sup> H COSY spectrum of spirobrefeldin A ( <b>1</b> , DMSO- <i>d</i> <sub>6</sub> ) | 6    |
| 4   | <b>Figure S4</b> HSQC spectrum of spirobrefeldin A ( <b>1</b> , DMSO- <i>d</i> <sub>6</sub> ),                                | 7    |
| 5   | <b>Figure S5</b> HMBC spectrum of spirobrefeldin A ( <b>1</b> , DMSO- <i>d</i> <sub>6</sub> )                                 | 8    |
| 6   | <b>Figure S6</b> NOESY spectrum of spirobrefeldin A ( <b>1</b> , DMSO- <i>d</i> <sub>6</sub> )                                | 9    |
| 7   | <b>Figure S7</b> HRESIMS spectrum of spirobrefeldin A ( <b>1</b> )                                                            | 10   |
| 8   | <b>Figure S8</b> IR spectrum of spirobrefeldin A ( <b>1</b> )                                                                 | 11   |
| 9   | <b>Figure S9</b> CD spectrum of spirobrefeldin A ( <b>1</b> )                                                                 | 12   |
| 10  | <b>Figure S10</b> <sup>1</sup> H NMR spectrum of spirobrefeldin B ( <b>2</b> , 600 MHz, DMSO- <i>d</i> <sub>6</sub> )         | 13   |
| 11  | <b>Figure S11</b> <sup>13</sup> C NMR spectrum of spirobrefeldin B ( <b>2</b> , 150 MHz, DMSO- <i>d</i> <sub>6</sub> )        | 14   |
| 12  | <b>Figure S12</b> <sup>1</sup> H- <sup>1</sup> H COSY spectrum of spirobrefeldin B ( <b>2</b> , DMSO- <i>d</i> <sub>6</sub> ) | 15   |
| 13  | <b>Figure S13</b> HSQC spectrum of spirobrefeldin B ( <b>2</b> , DMSO- <i>d</i> <sub>6</sub> ),                               | 16   |
| 14  | <b>Figure S14</b> HMBC spectrum of spirobrefeldin B ( <b>2</b> , DMSO- <i>d</i> <sub>6</sub> )                                | 17   |
| 15  | <b>Figure S15</b> NOESY spectrum of spirobrefeldin B ( <b>2</b> , DMSO- <i>d</i> <sub>6</sub> )                               | 18   |
| 16  | <b>Figure S16</b> HRESIMS spectrum of spirobrefeldin B ( <b>2</b> )                                                           | 19   |
| 17  | <b>Figure S17</b> IR spectrum of spirobrefeldin B ( <b>2</b> )                                                                | 20   |
| 18  | <b>Figure S18</b> CD spectrum of spirobrefeldin B ( <b>2</b> )                                                                | 21   |
| 19  | <b>Figure S19</b> <sup>1</sup> H NMR spectrum of spirobrefeldin C ( <b>3</b> , 600 MHz, DMSO- <i>d</i> <sub>6</sub> )         | 22   |
| 20  | <b>Figure S20</b> <sup>13</sup> C NMR spectrum of spirobrefeldin C ( <b>3</b> , 150 MHz, DMSO- <i>d</i> <sub>6</sub> )        | 23   |
| 21  | <b>Figure S21</b> HSQC spectrum of spirobrefeldin C ( <b>3</b> , DMSO- <i>d</i> <sub>6</sub> )                                | 24   |
| 22  | <b>Figure S22</b> HMBC spectrum of spirobrefeldin C ( <b>3</b> , DMSO- <i>d</i> <sub>6</sub> )                                | 25   |
| 23  | <b>Figure S23</b> <sup>1</sup> H- <sup>1</sup> H COSY spectrum of spirobrefeldin C ( <b>3</b> , DMSO- <i>d</i> <sub>6</sub> ) | 26   |
| 24  | <b>Figure S24</b> NOESY spectrum of spirobrefeldin C ( <b>3</b> , DMSO- <i>d</i> <sub>6</sub> )                               | 27   |
| 25  | <b>Figure S25</b> HRESIMS spectrum of spirobrefeldin C ( <b>3</b> )                                                           | 28   |
| 26  | <b>Figure S26</b> IR spectrum of spirobrefeldin C ( <b>3</b> )                                                                | 29   |
| 27  | <b>Figure S27</b> CD spectrum of spirobrefeldin C ( <b>3</b> )                                                                | 30   |
| 36  | <b>Figure S28</b> <sup>1</sup> H NMR spectrum of <b>4</b> (600 MHz, DMSO- <i>d</i> <sub>6</sub> )                             | 31   |
| 37  | <b>Figure S29</b> <sup>13</sup> C NMR spectrum of <b>4</b> (150 MHz, DMSO- <i>d</i> <sub>6</sub> )                            | 32   |
| 38  | <b>Figure S30</b> <sup>1</sup> H NMR spectrum of <b>5</b> (600 MHz, DMSO- <i>d</i> <sub>6</sub> )                             | 33   |
| 39  | <b>Figure S31</b> <sup>13</sup> C NMR spectrum of <b>5</b> (150 MHz, DMSO- <i>d</i> <sub>6</sub> )                            | 34   |
| 40  | <b>Figure S32</b> <sup>1</sup> H NMR spectrum of <b>6</b> (600 MHz, DMSO- <i>d</i> <sub>6</sub> )                             | 35   |
| 41  | <b>Figure S33</b> <sup>13</sup> C NMR spectrum of <b>6</b> (150 MHz, DMSO- <i>d</i> <sub>6</sub> )                            | 36   |
| 42  | <b>Figure S34</b> <sup>1</sup> H NMR spectrum of <b>7</b> (600 MHz, DMSO- <i>d</i> <sub>6</sub> )                             | 37   |
| 43  | <b>Figure S35</b> <sup>13</sup> C NMR spectrum of <b>7</b> (150 MHz, DMSO- <i>d</i> <sub>6</sub> )                            | 38   |
| 44  | <b>Figure S36</b> HSQC spectrum of spirotryprostatin G( <b>5</b> , DMSO- <i>d</i> <sub>6</sub> )                              | 39   |
| 45  | <b>Figure S37</b> HMBC spectrum of spirotryprostatin G( <b>5</b> , DMSO- <i>d</i> <sub>6</sub> )                              | 40   |
| 46  | <b>Figure S38</b> NOESY spectrum of spirotryprostatin G( <b>5</b> , DMSO- <i>d</i> <sub>6</sub> )                             | 41   |

---

|    |                                                                                                                                                                                                                          |    |
|----|--------------------------------------------------------------------------------------------------------------------------------------------------------------------------------------------------------------------------|----|
| 47 | <b>Table S1</b> DP4+ results of candidate configurations (2R,8S,9R,12R,18S)-5(Isomer 1) and (2S,8S,9R,12R,18S)-5(Isomer 2)                                                                                               | 42 |
| 48 | <b>Table S2</b> Linear correlation coefficients (R2), root-mean-square deviation (RMSD) mean absolute deviation (MAD) and corrected mean absolute deviation (CMAD) analyses of the calculated and experimental NMR data. | 43 |
| 49 | <b>Table S3</b> Energy analyses of conformers (2R,8S,9R,12R,18S)-5a-(2R,8S,9R,12R,18S)-5b                                                                                                                                | 43 |
| 50 | <b>Table S4</b> Experimental <sup>13</sup> C-NMR chemical shifts and GIAO isotropic magnetic shielding values calculated for PCM/mPW1PW91/6-31+G (d, p) geometries of (2R,8S,9R,12R,18S)-5                               | 44 |
| 51 | <b>Table S5</b> Experimental <sup>1</sup> H-NMR chemical shifts and GIAO isotropic magnetic shielding values calculated for PCM/mPW1PW91/6-31+G (d, p) geometries of (2R,8S,9R,12R,18S)-5                                | 45 |
| 52 | <b>Table S6</b> Energy analyses of conformers (2S,8S,9R,12R,18S)-5a-(2S,8S,9R,12R,18S)-5h                                                                                                                                | 46 |
| 53 | <b>Table S7</b> Experimental <sup>13</sup> C-NMR chemical shifts and GIAO isotropic magnetic shielding values calculated for PCM/mPW1PW91/6-31+G (d, p) geometries of (2S,8S,9R,12R,18S)-5                               | 47 |
| 54 | <b>Table S8</b> Experimental <sup>1</sup> H-NMR chemical shifts and GIAO isotropic magnetic shielding values calculated for PCM/mPW1PW91/6-31+G (d, p) geometries of (2S,8S,9R,12R,18S)-5                                | 48 |

---

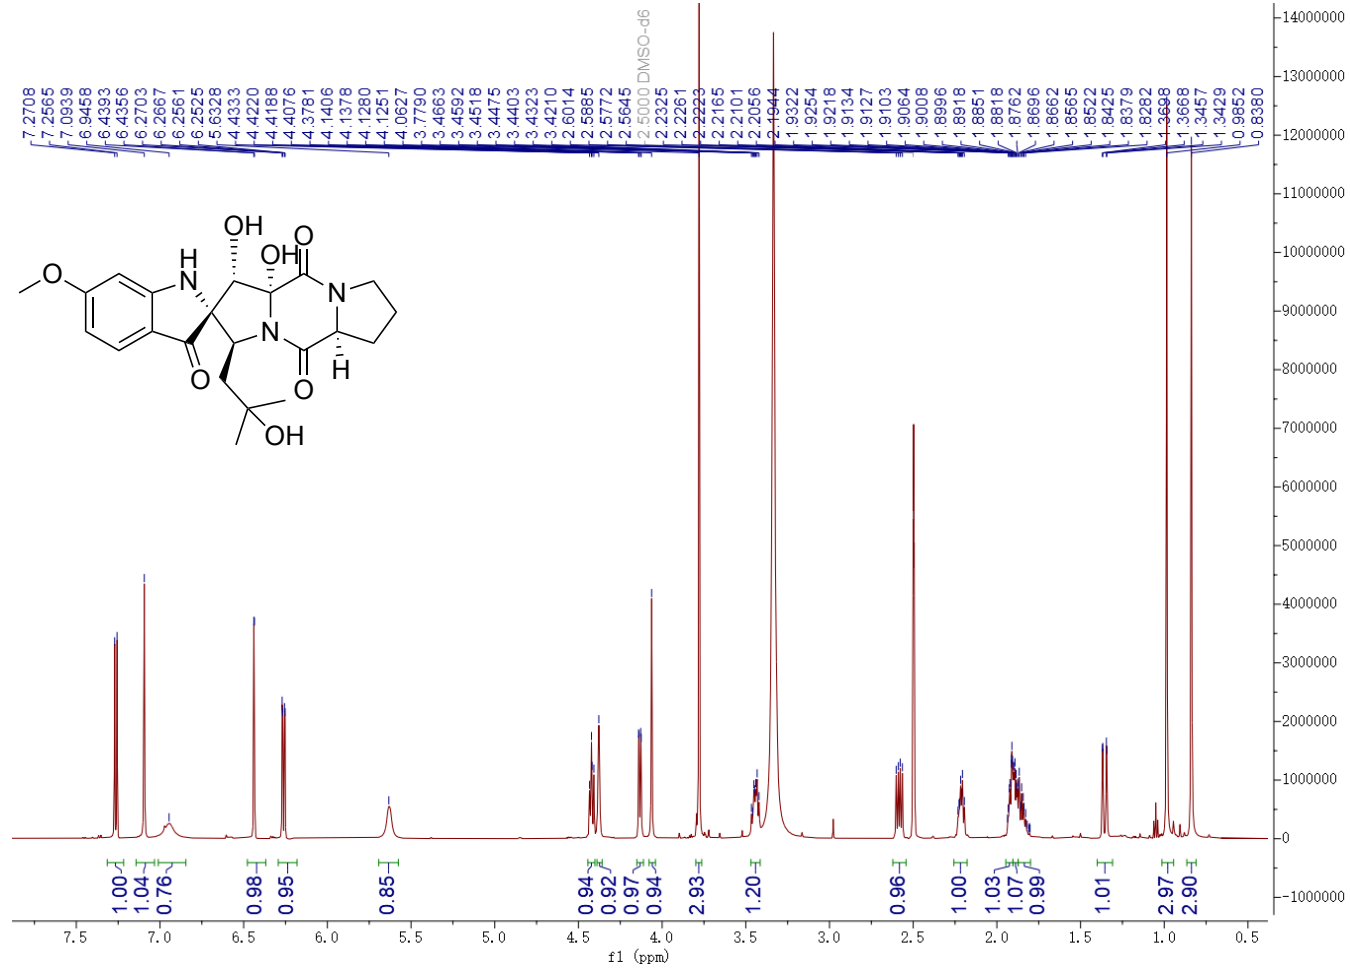

Fig. S1  $^1\text{H}$  NMR spectrum of 1

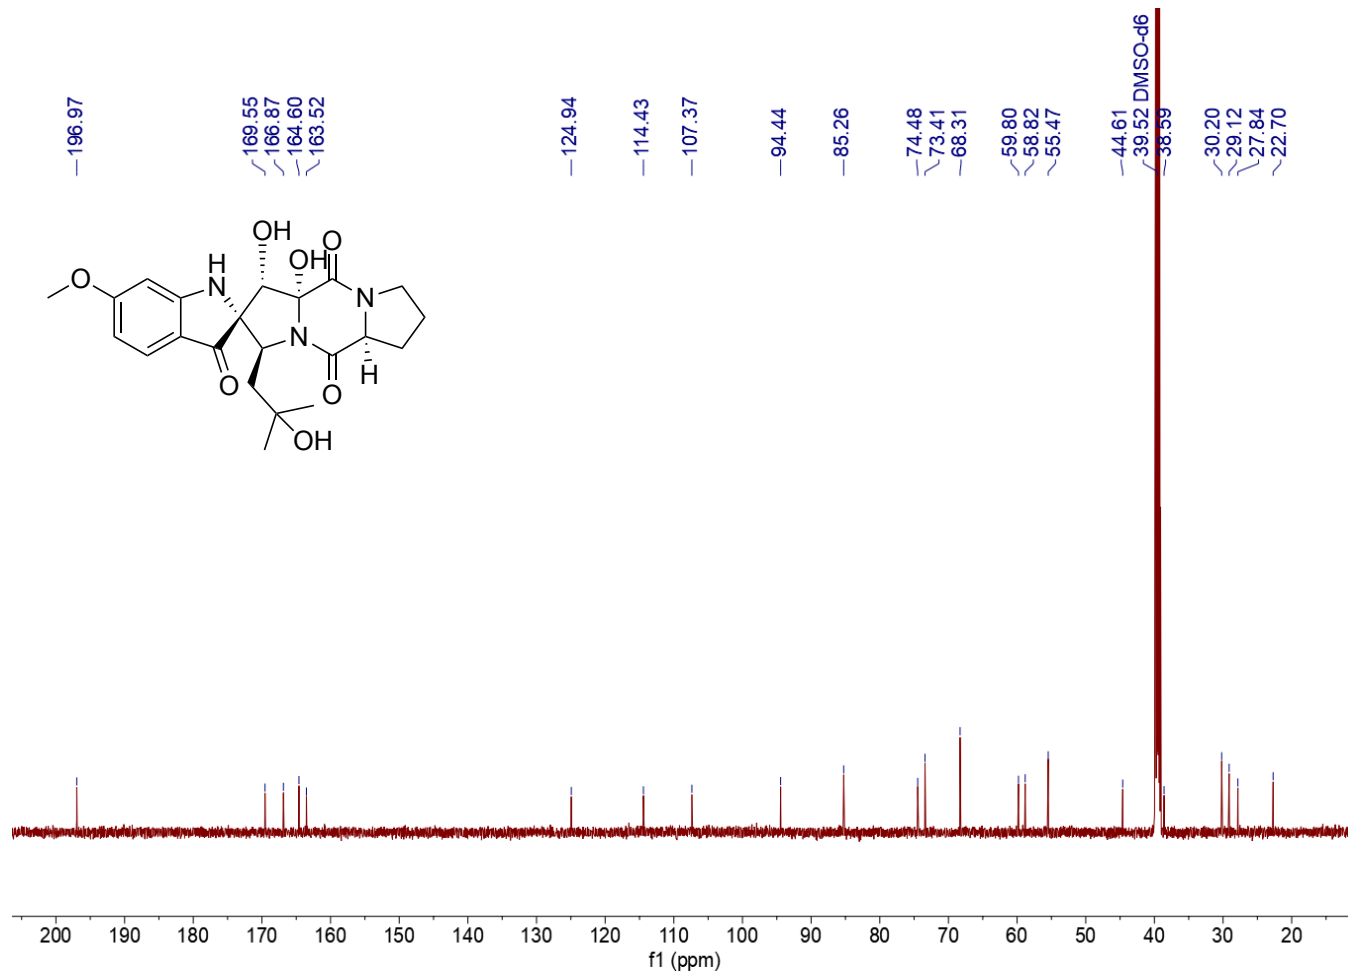

Fig. S2 <sup>13</sup>C NMR spectrum of **1**

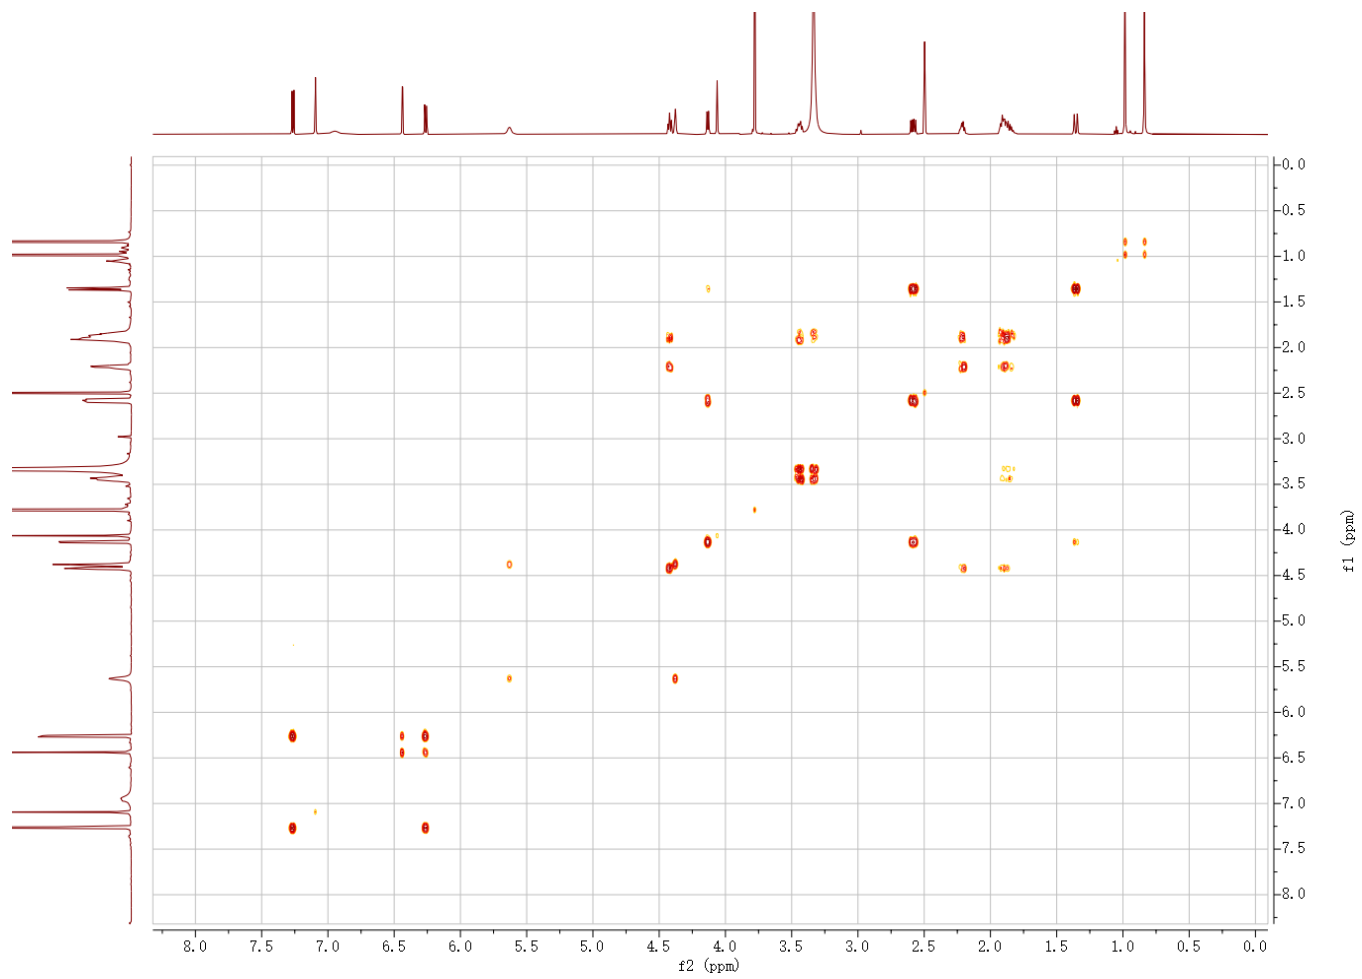

**Fig. S3**  $^1\text{H}$ - $^1\text{H}$  COSY spectrum of **1**

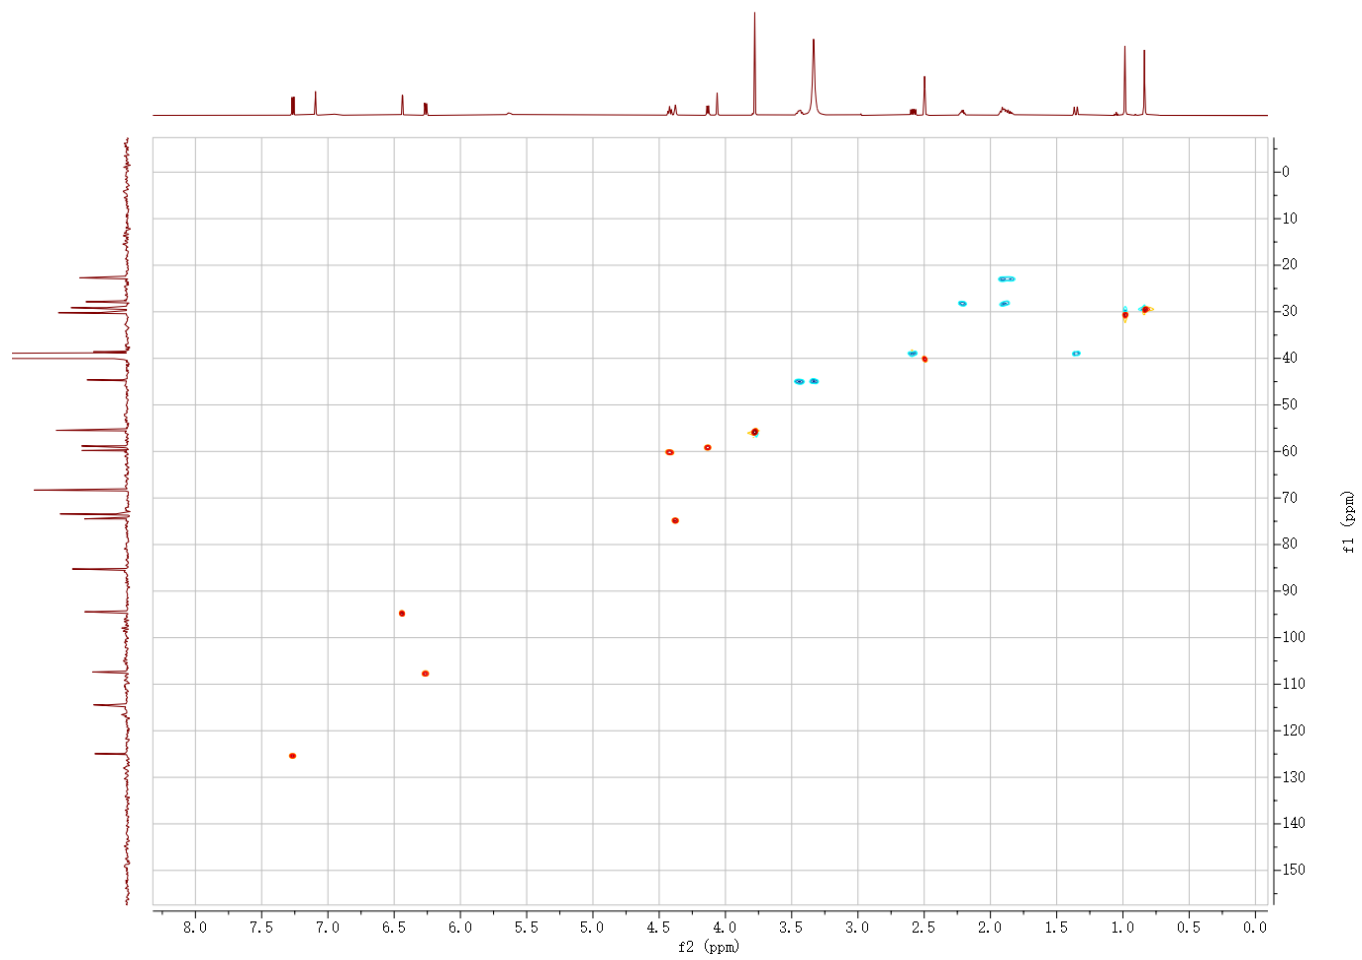

**Fig. S4** HSQC spectrum of **1**

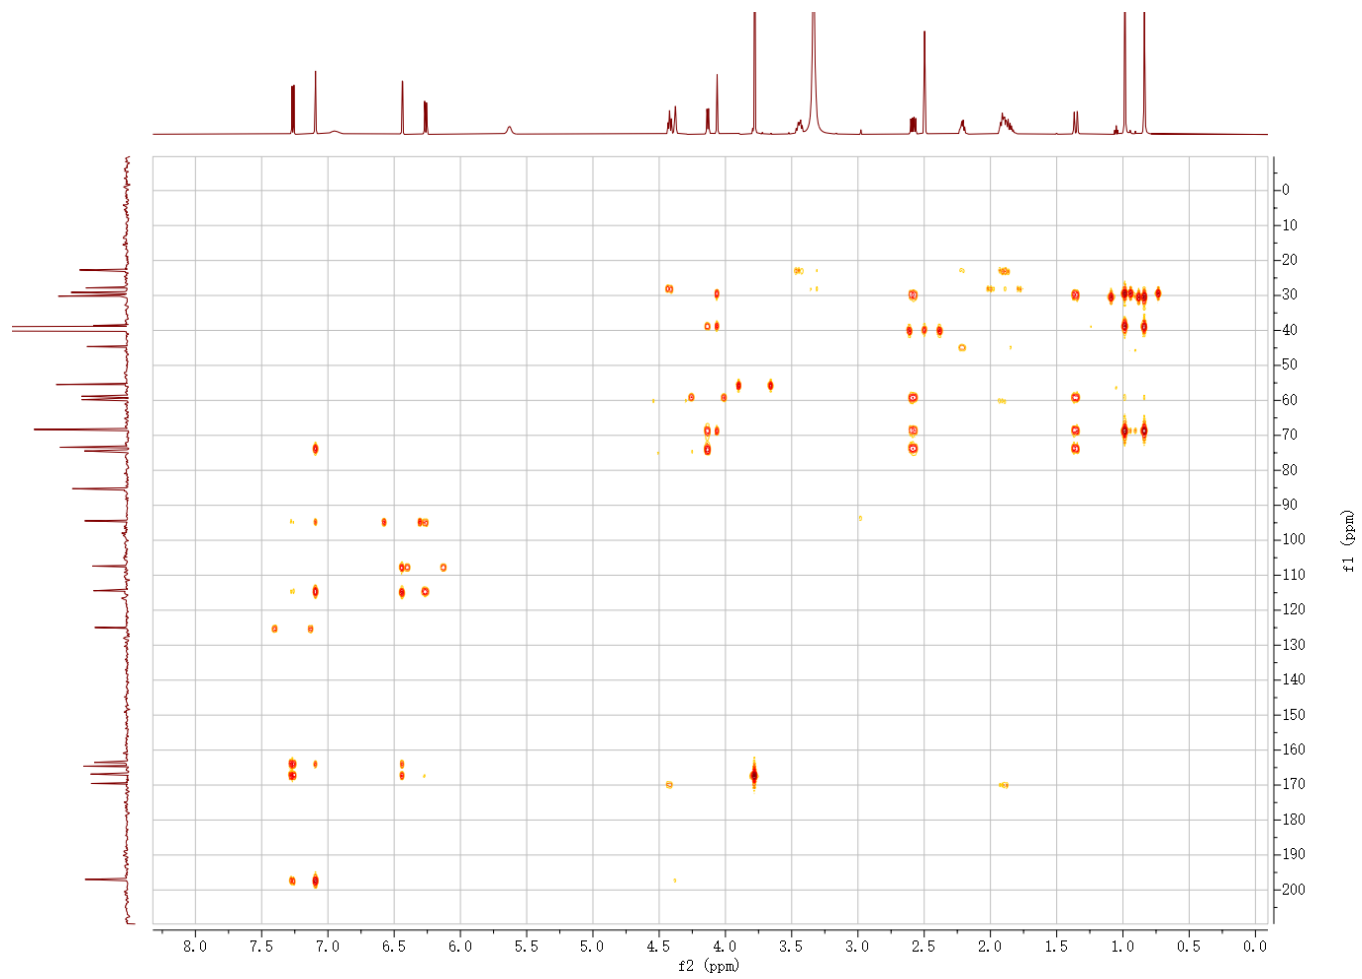

**Fig. S5** HMBC spectrum of **1**



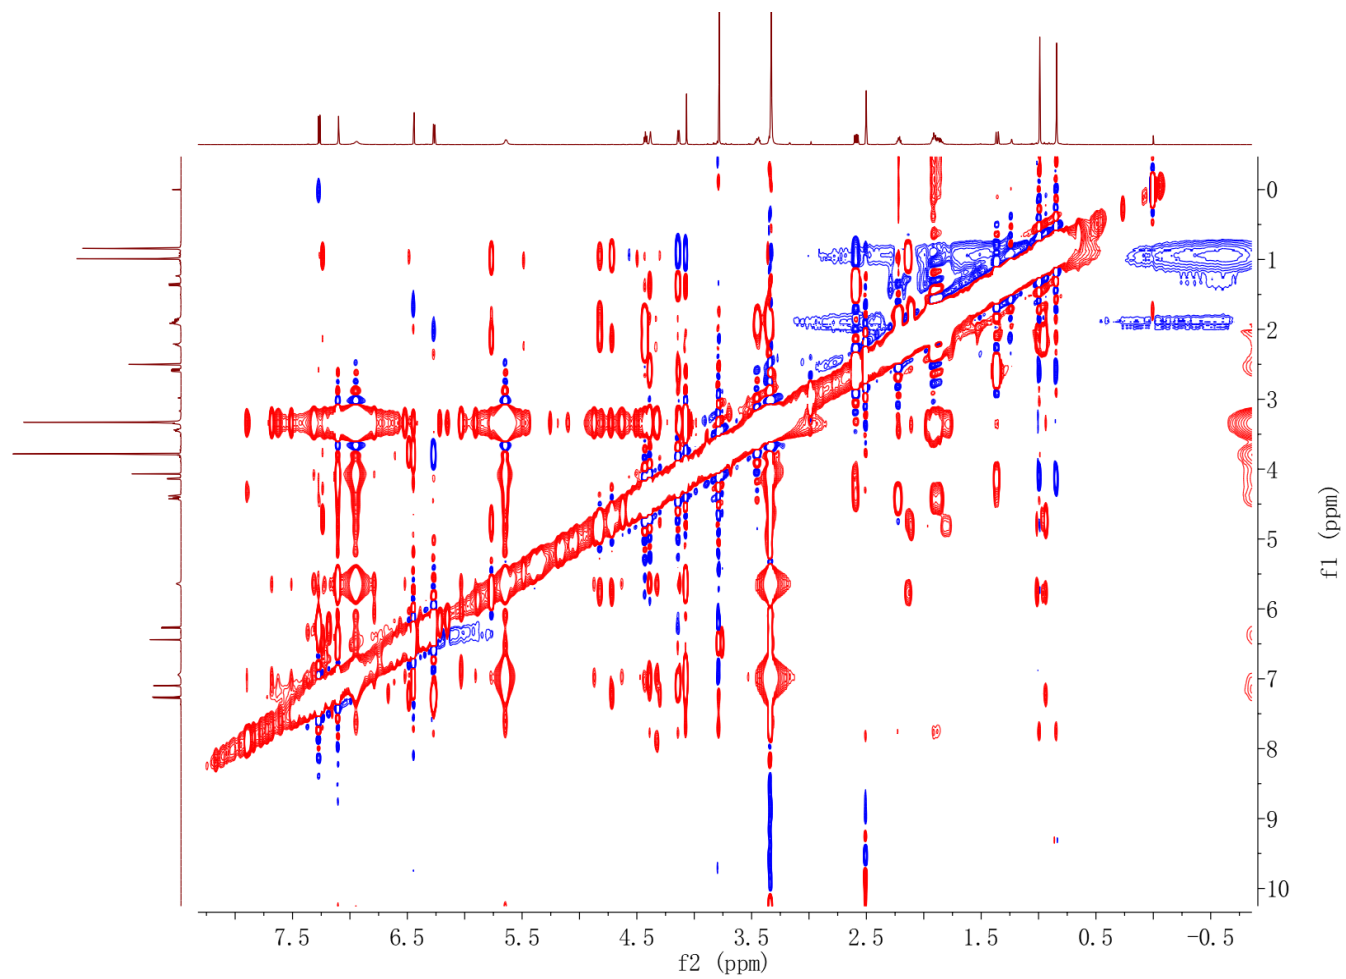

**Fig. S6** NOESY spectrum (600 MHz, DMSO) of Compound **1**

F: FTMS - p ESI Full ms [100.0000-1000.0000]

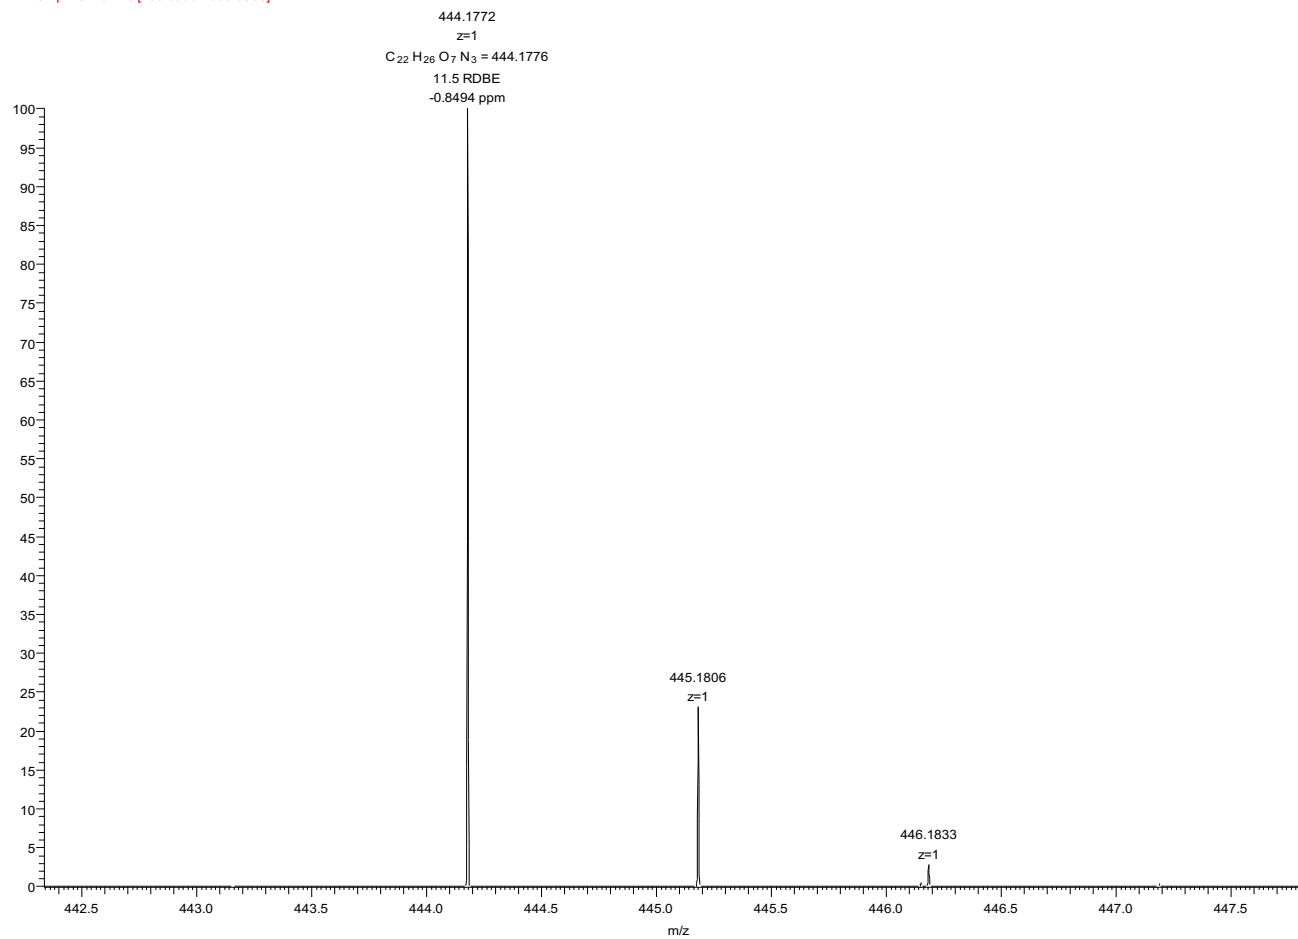

Fig. S7 HRESIMS spectrum of 1

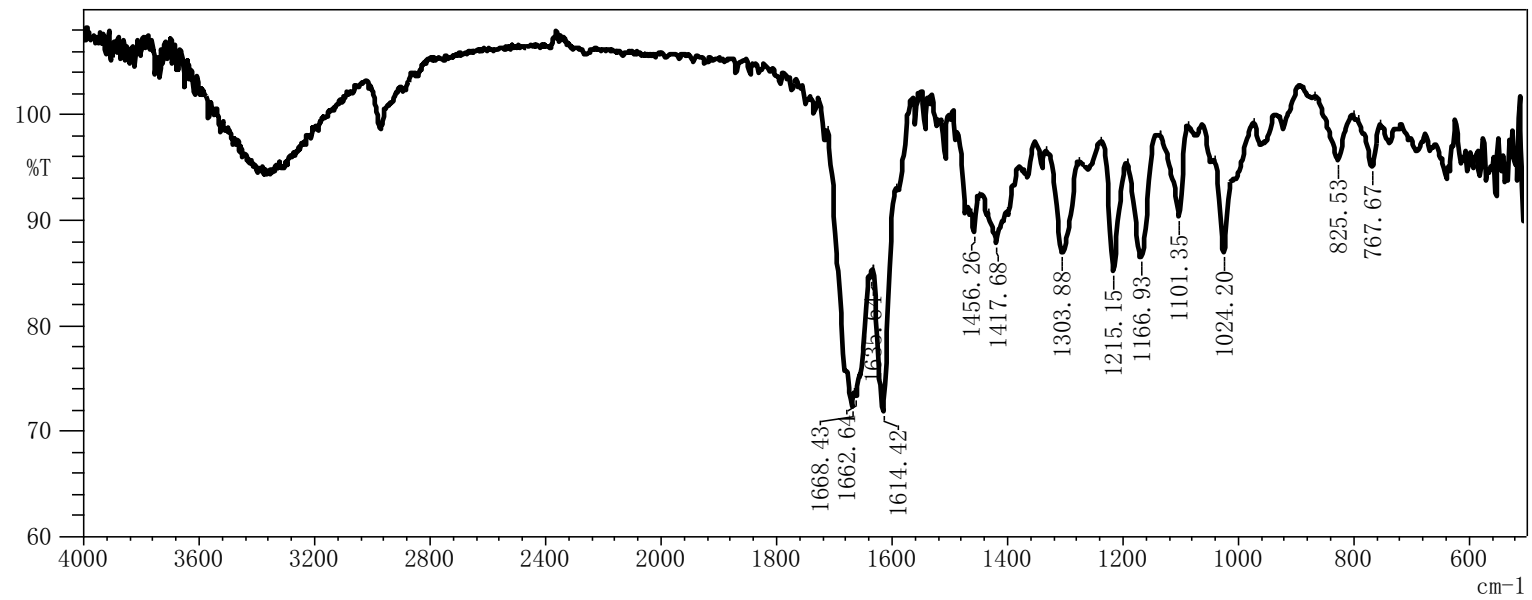

**Fig. S8** IR spectrum of **1**

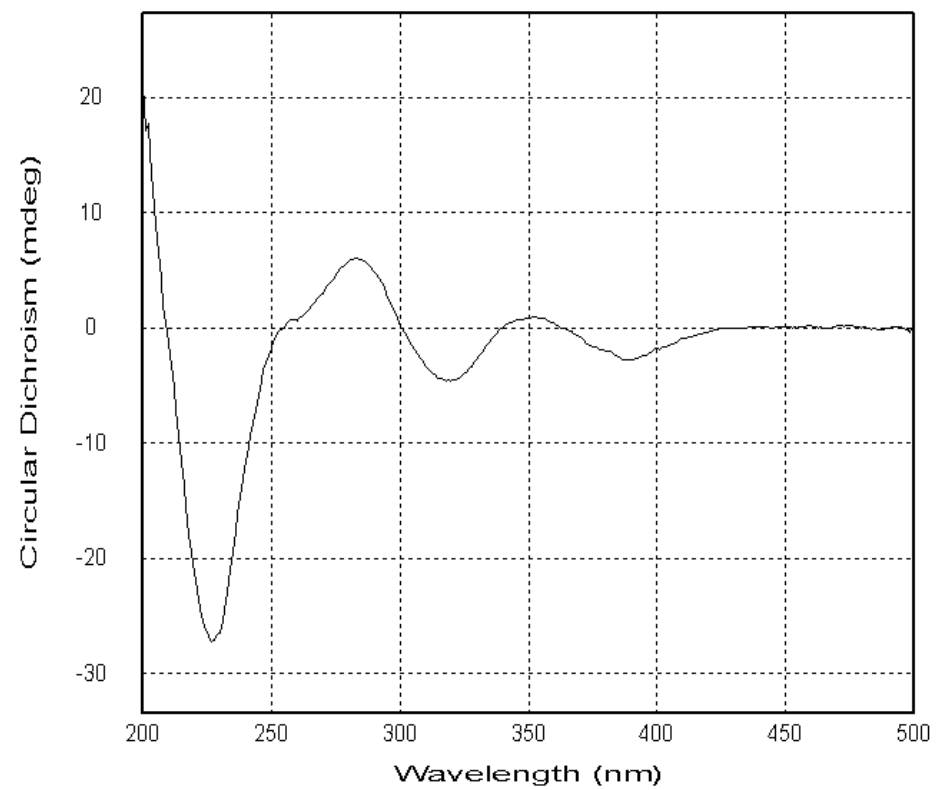

**Fig. S9** Experimental CD spectrum of **1**

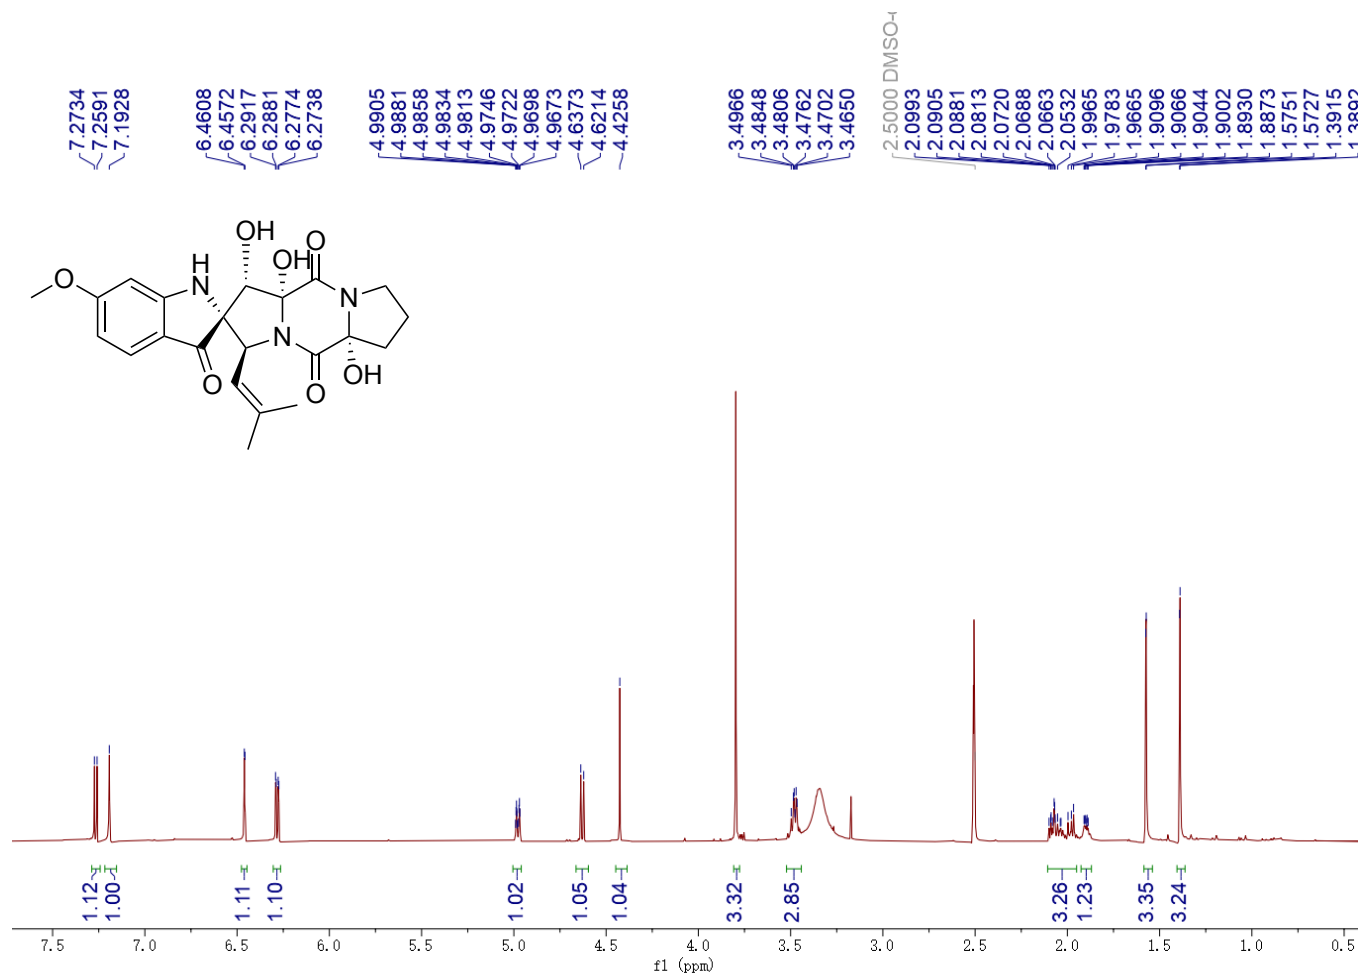

Fig. S10 <sup>1</sup>H NMR spectrum of 2

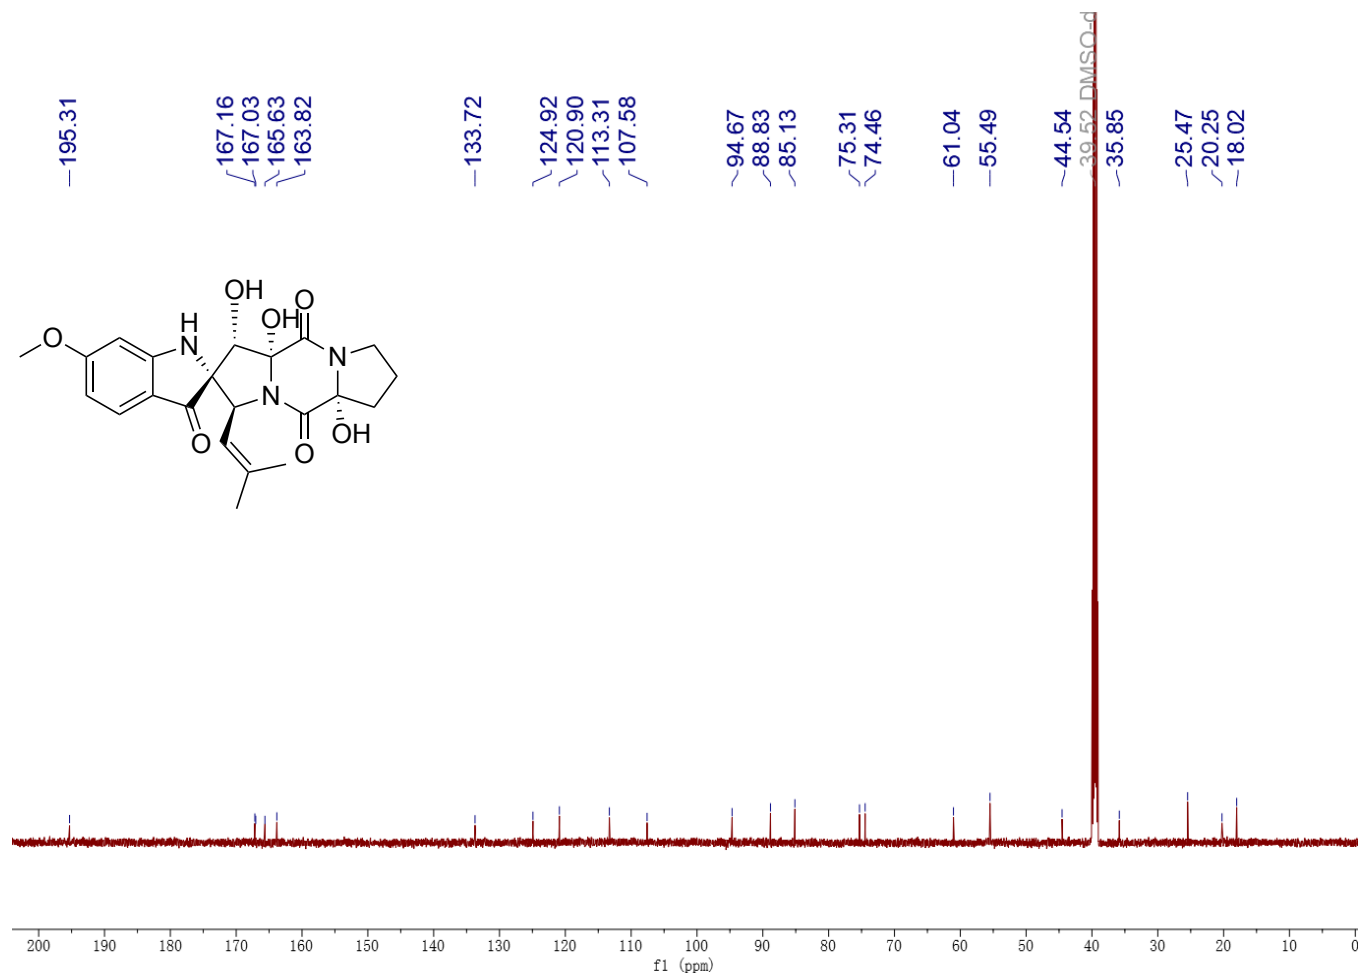

Fig. S11  $^{13}\text{C}$  NMR spectrum of 2

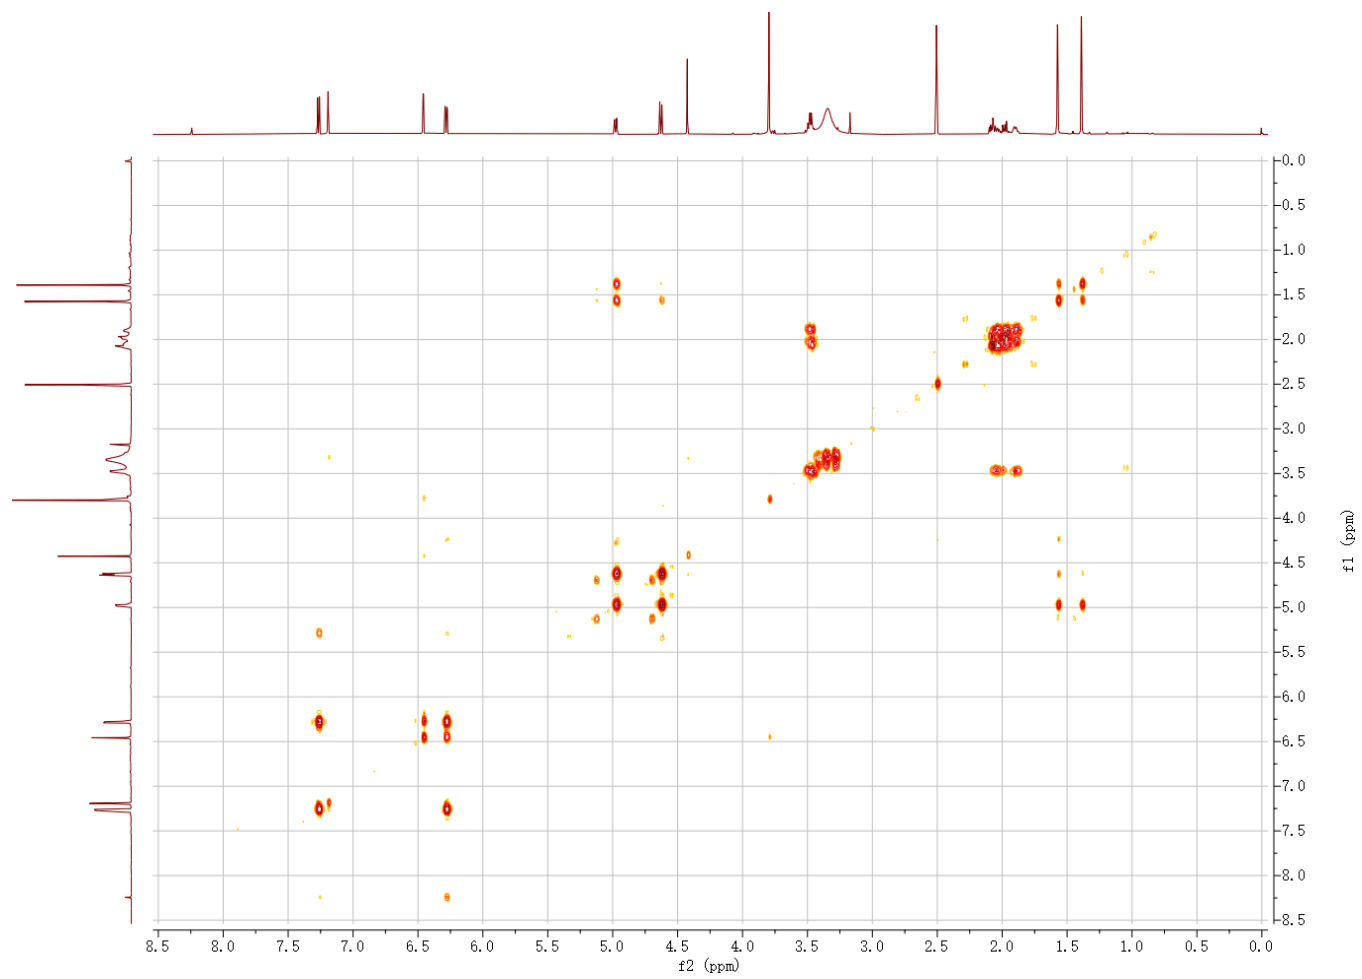

**Fig. S12**  $^1\text{H}$ - $^1\text{H}$  COSY spectrum of **2**

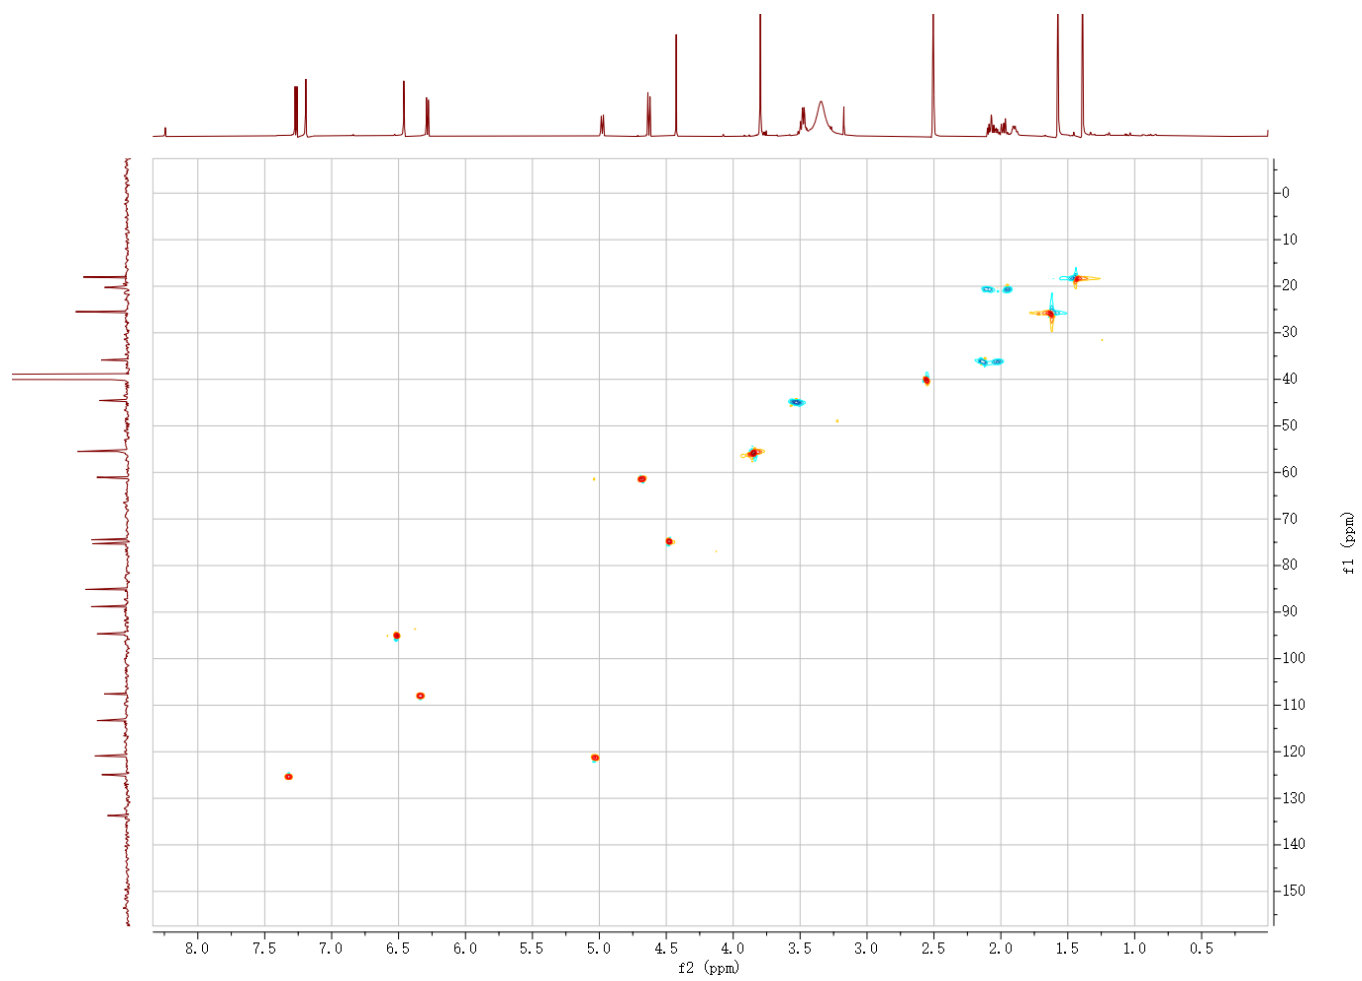

**Fig. S13** HSQC spectrum of **2**



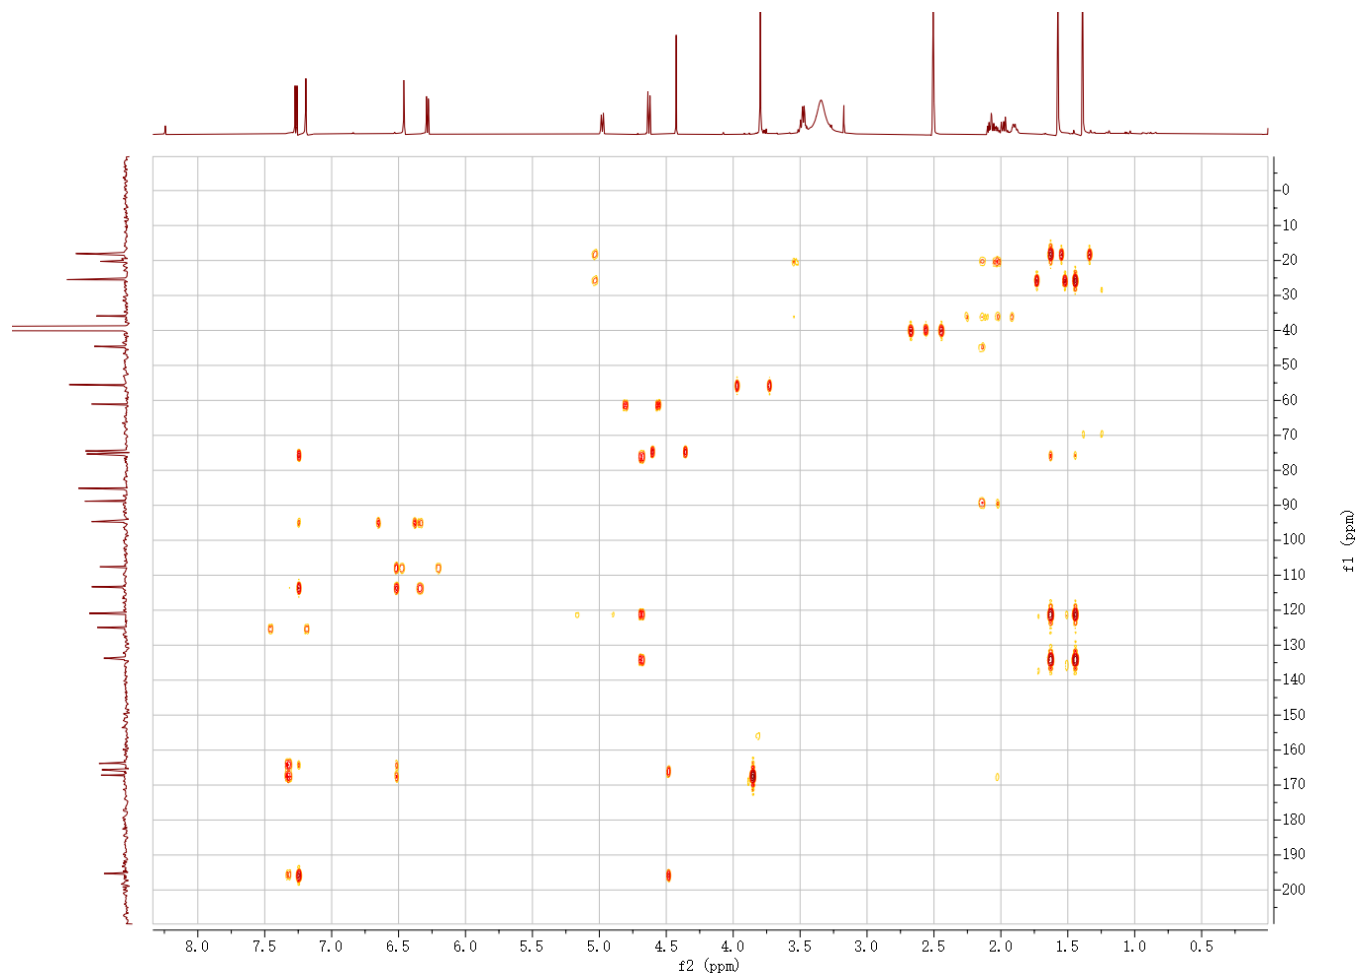

**Fig. S14** HMBC spectrum of **2**

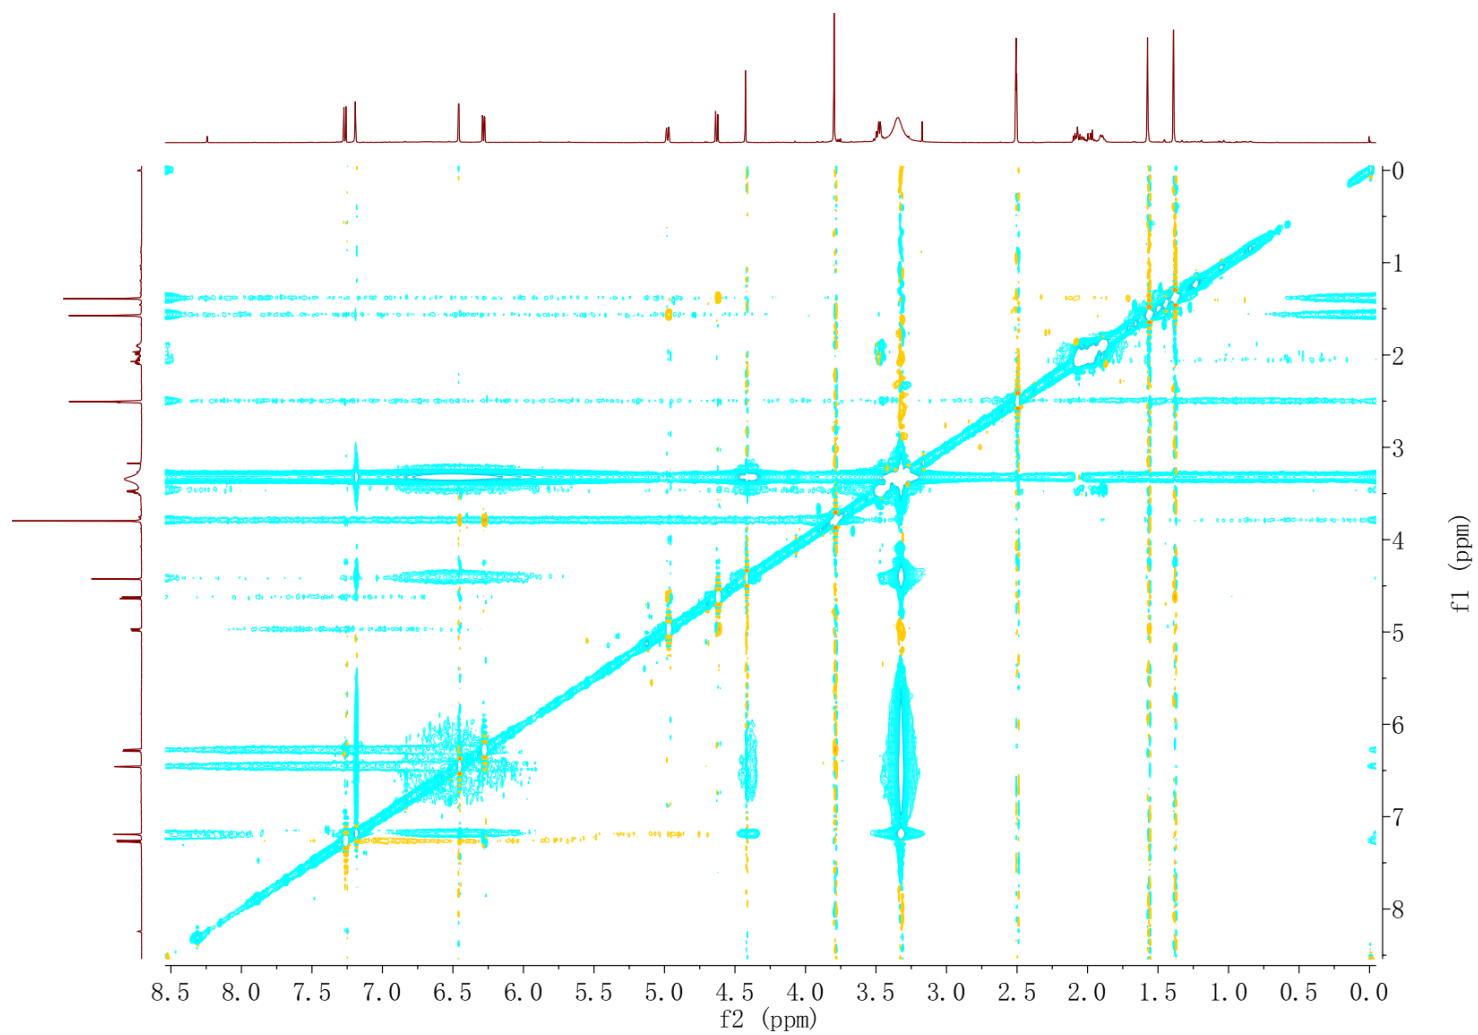

Fig. S15 NOESY spectrum of 2

F: FTMS - p ESI Full ms [100.0000-1000.0000]

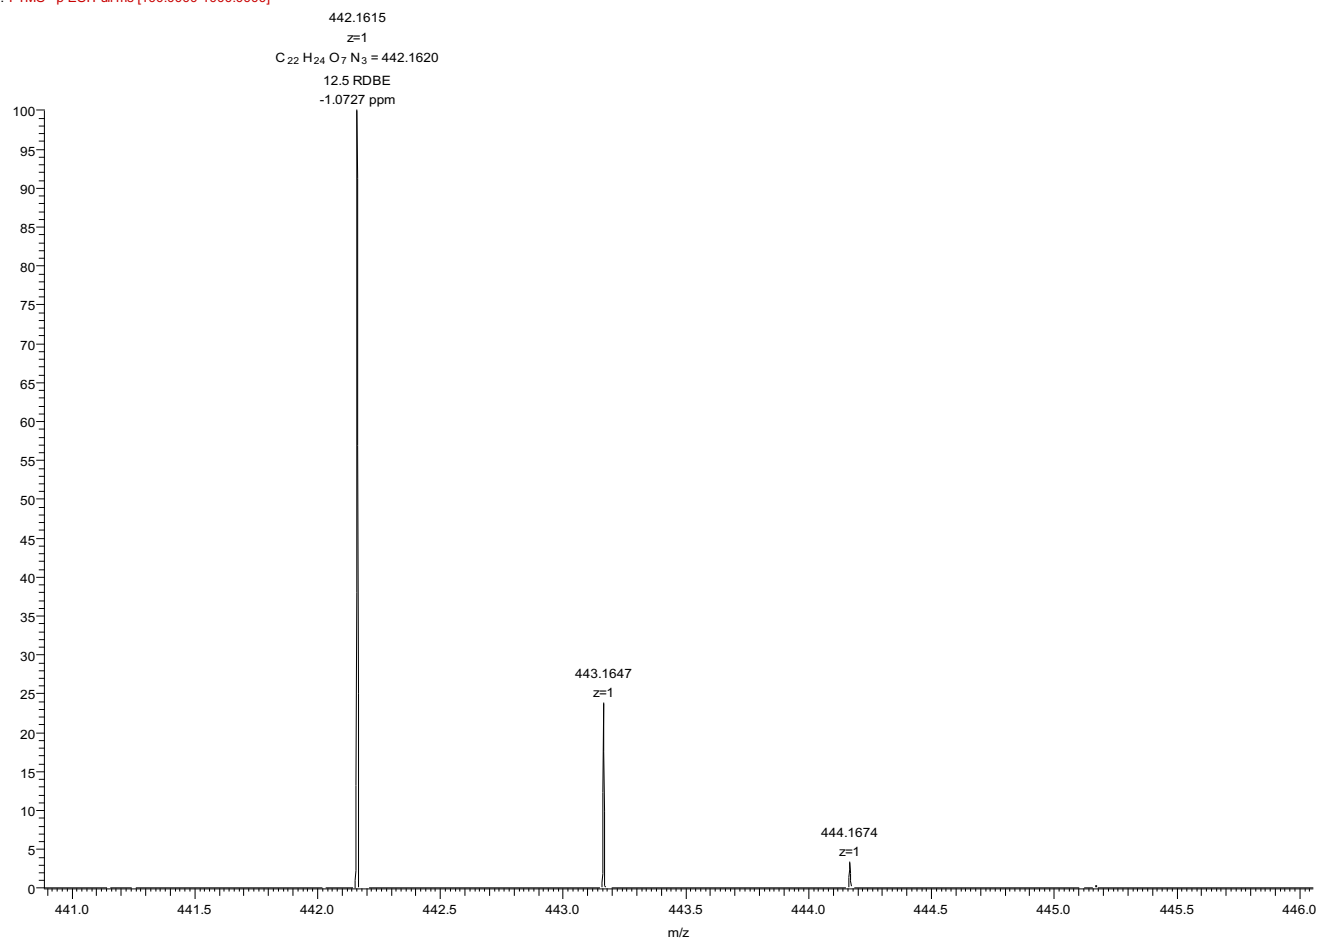

**Fig. S16** HRESIMS spectrum of **2**

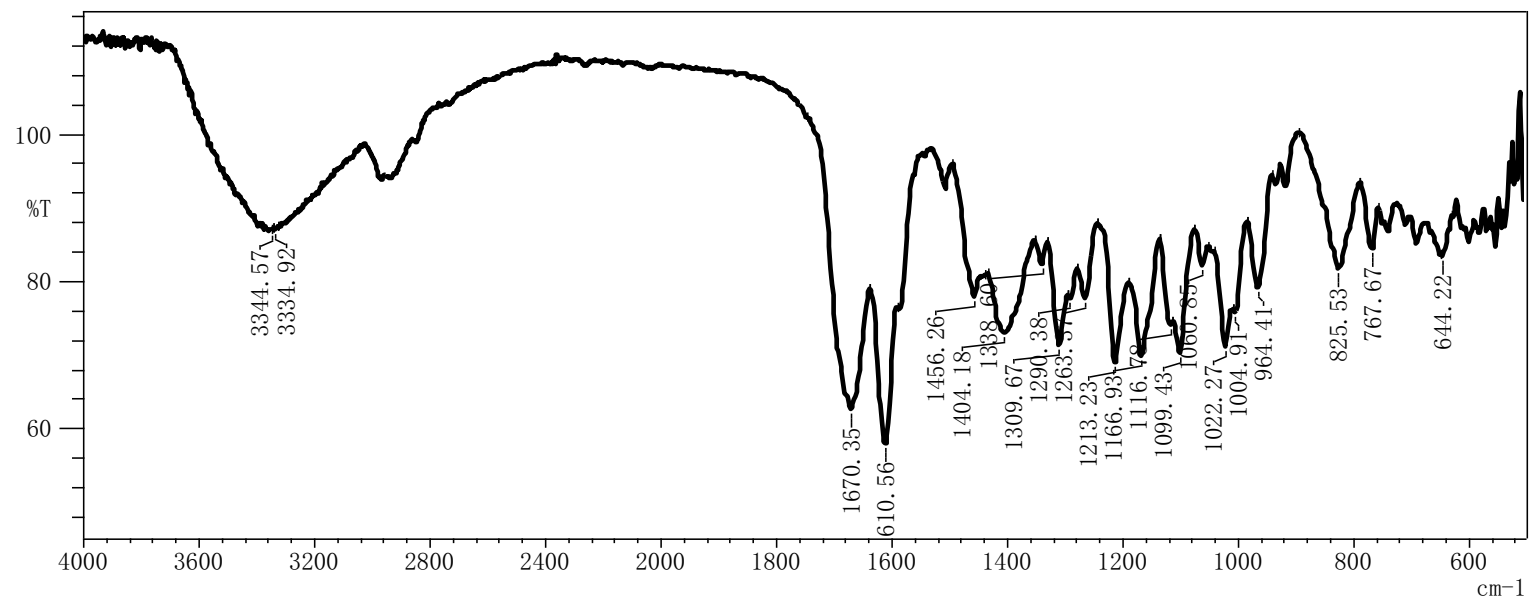

**Fig. S17** IR spectrum of **2**

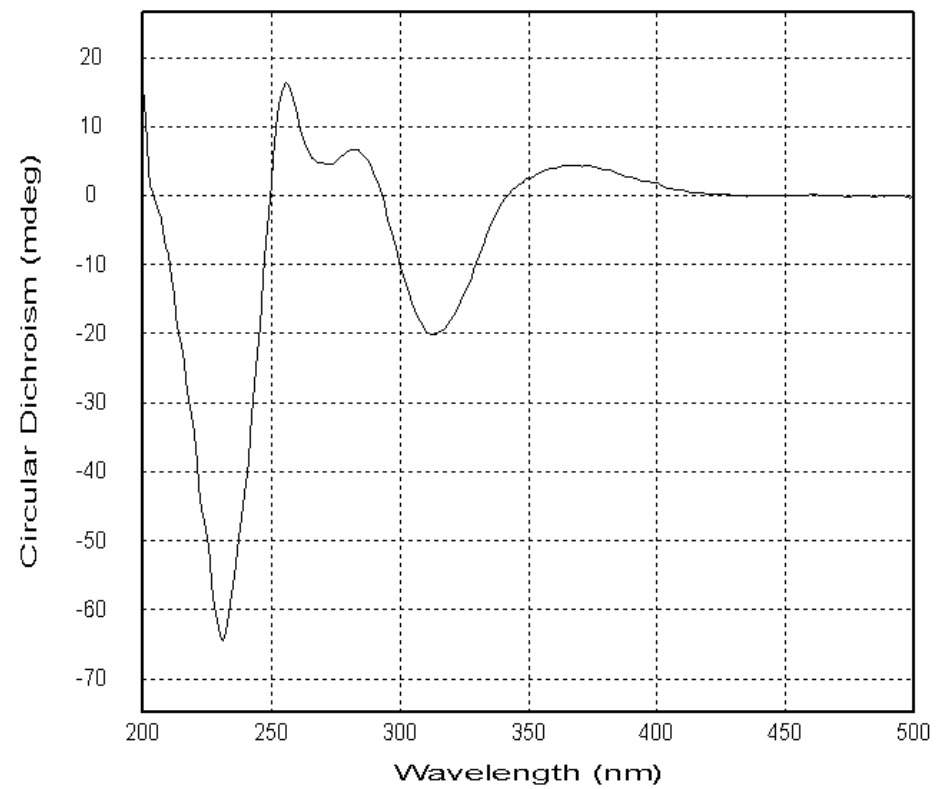

**Fig. S18** Experimental CD spectrum of **2**

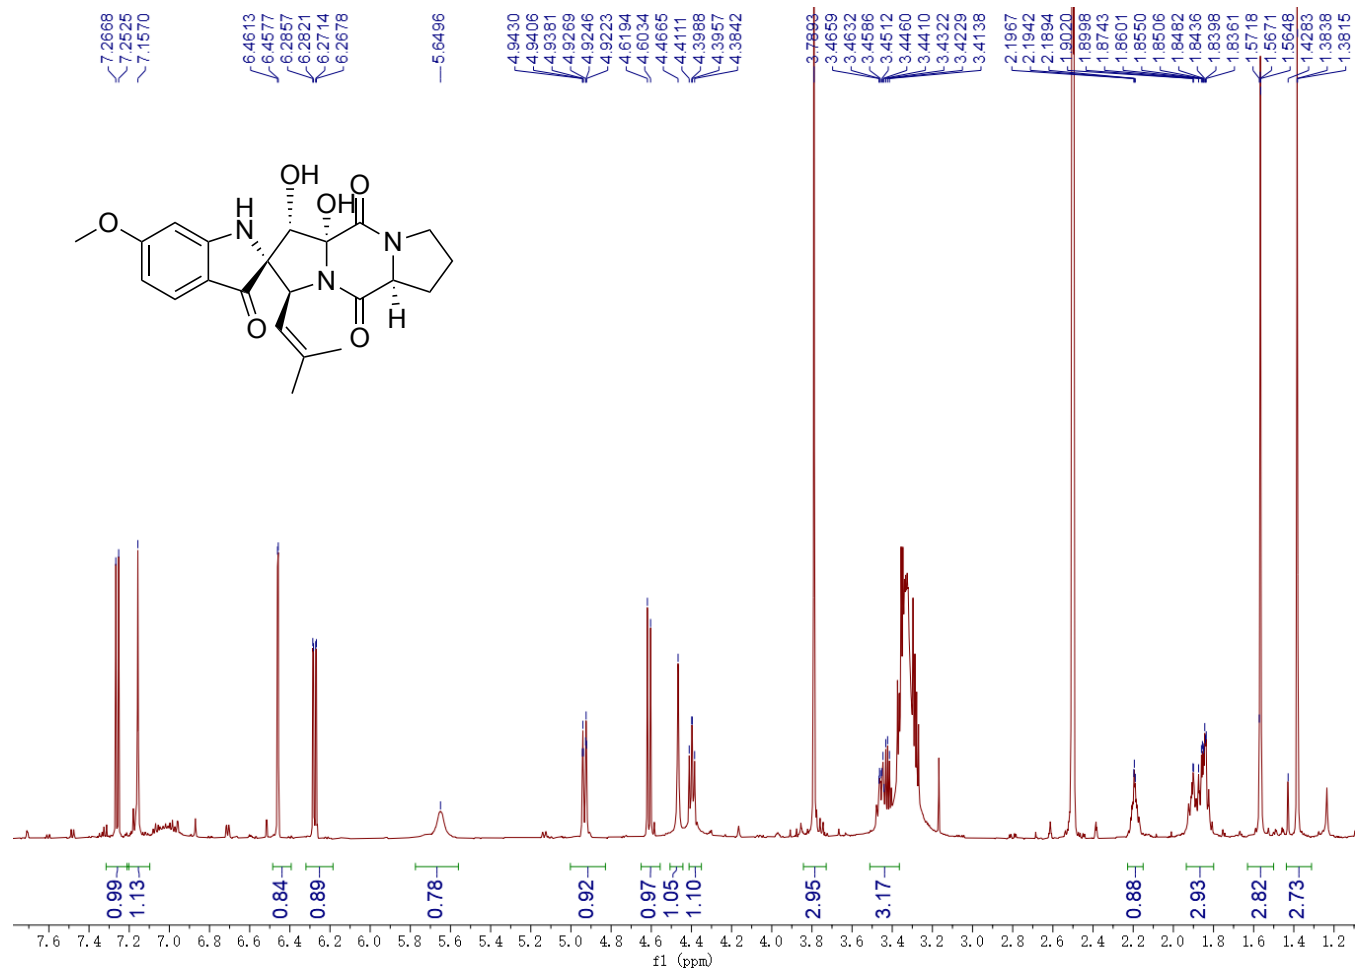

Fig. S19 <sup>1</sup>H NMR spectrum of 3

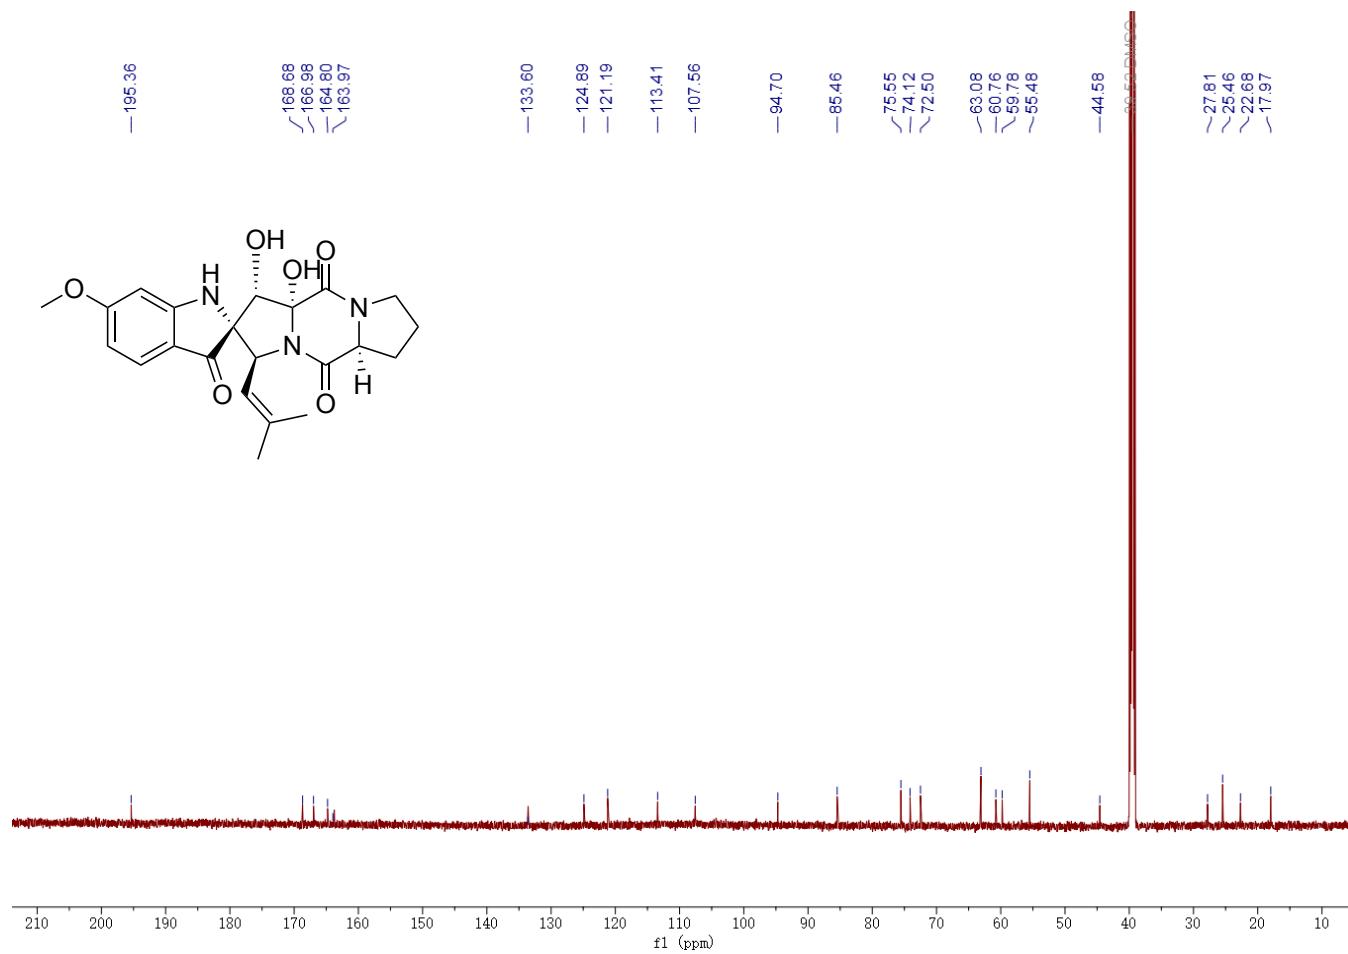

Fig. S20  $^{13}\text{C}$  NMR spectrum of 3

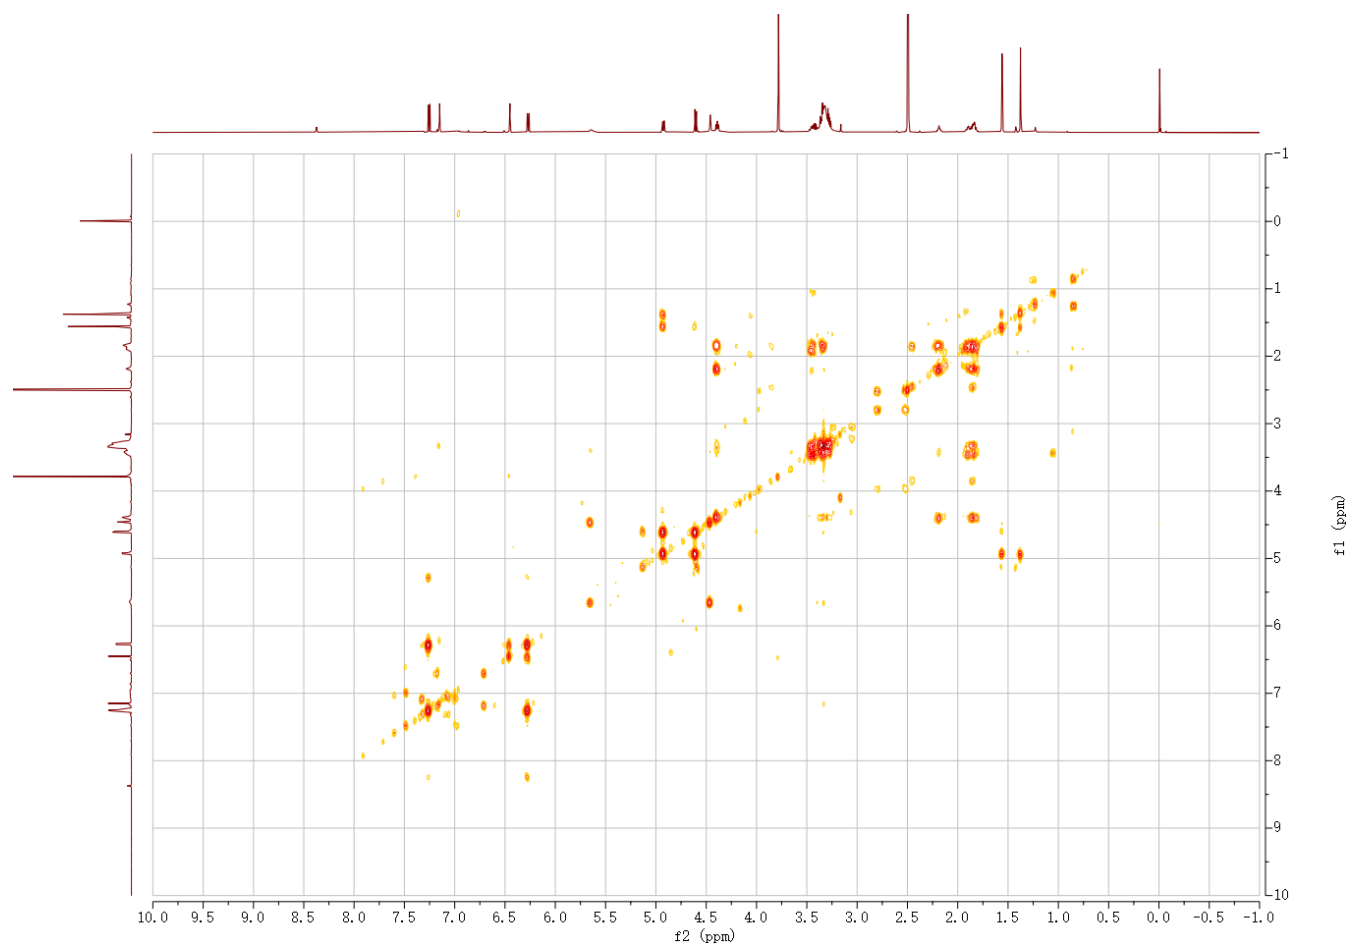

**Fig. S21**  $^1\text{H}$ - $^1\text{H}$  COSY spectrum of **3**



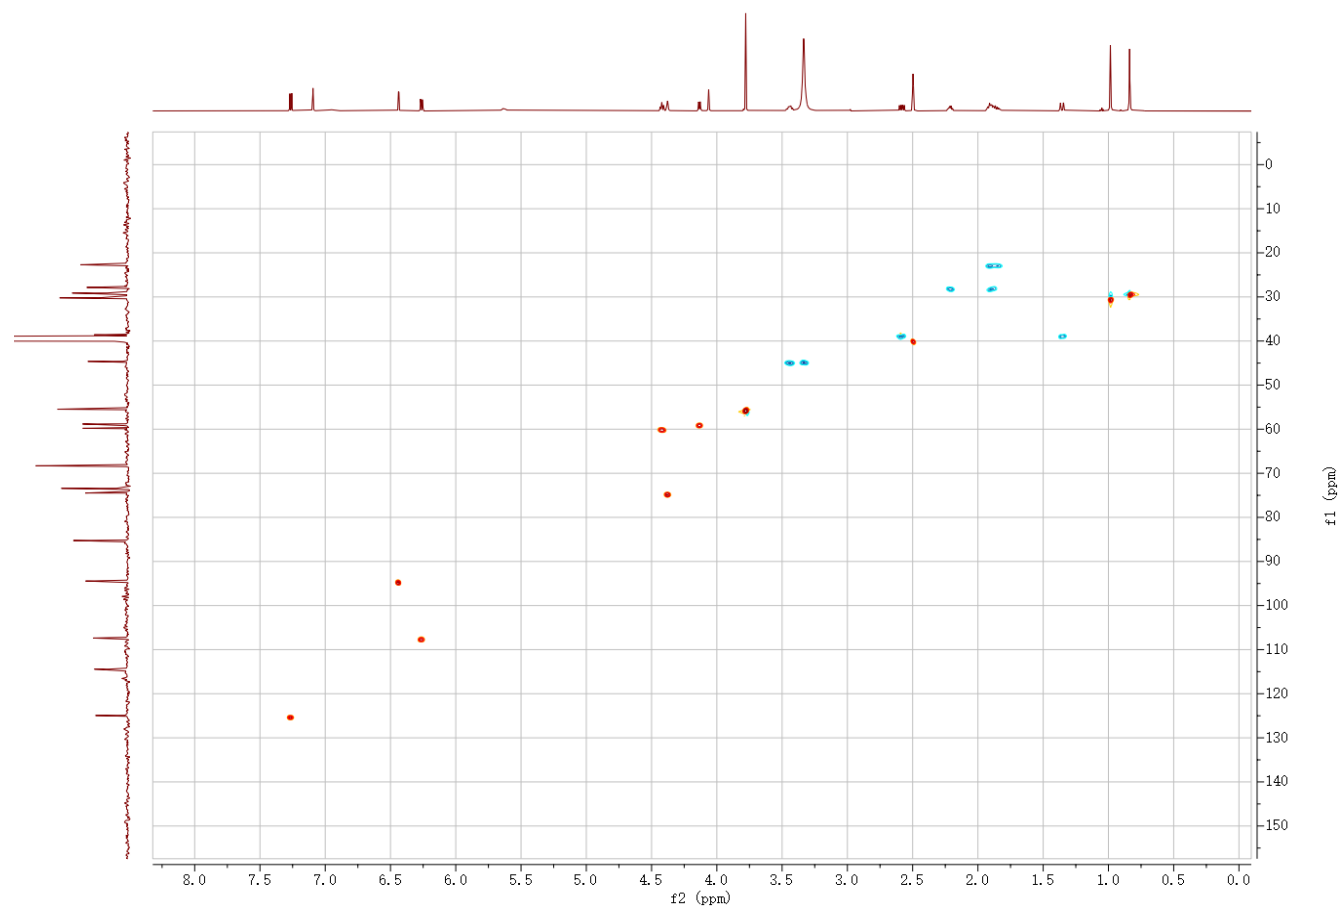

**Fig. S22** HSQC spectrum of **3**

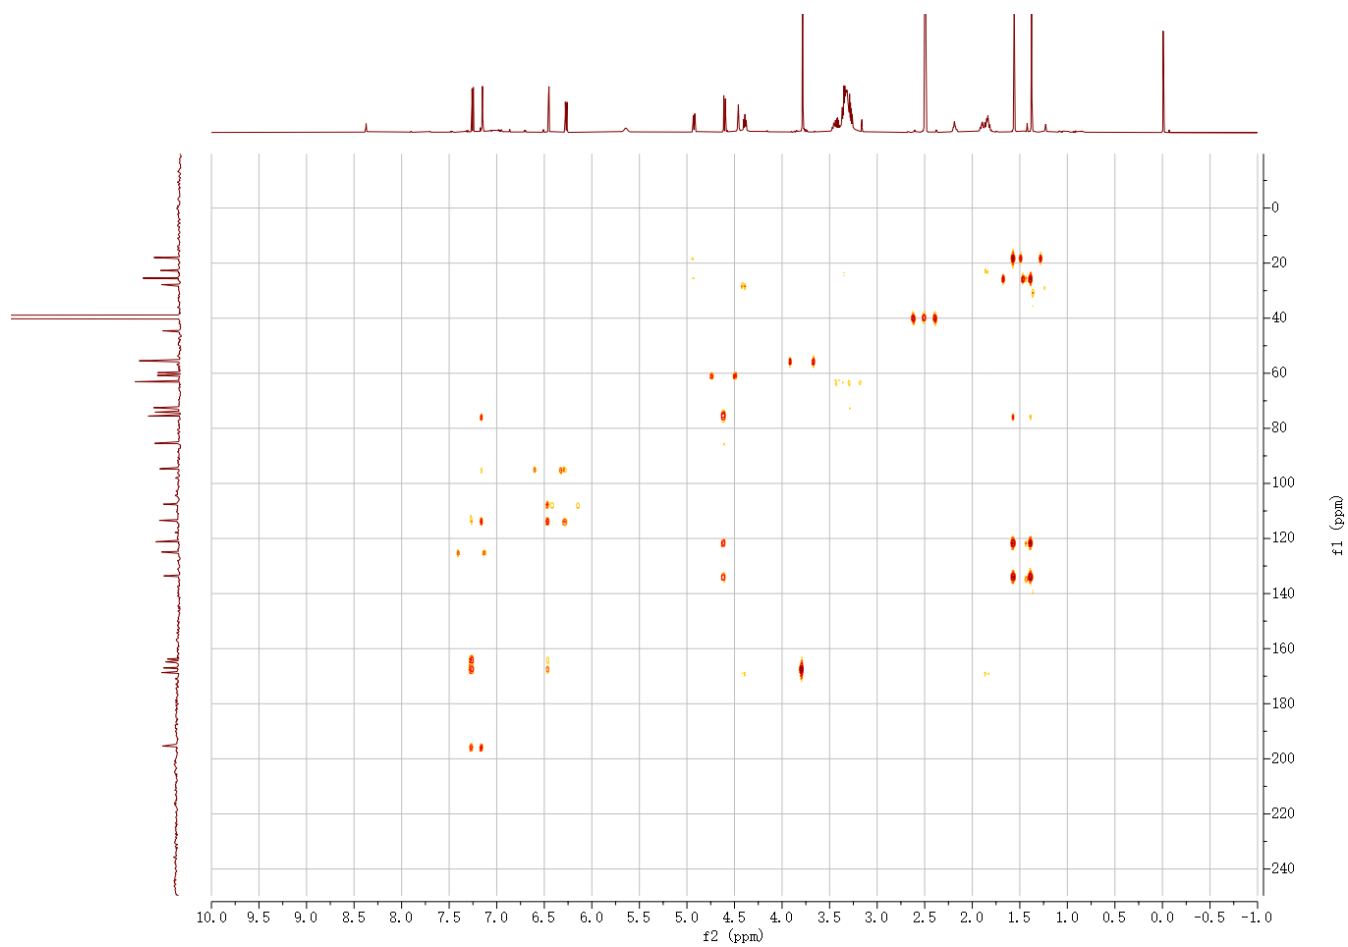

**Fig. S23** HMBC spectrum of **3**

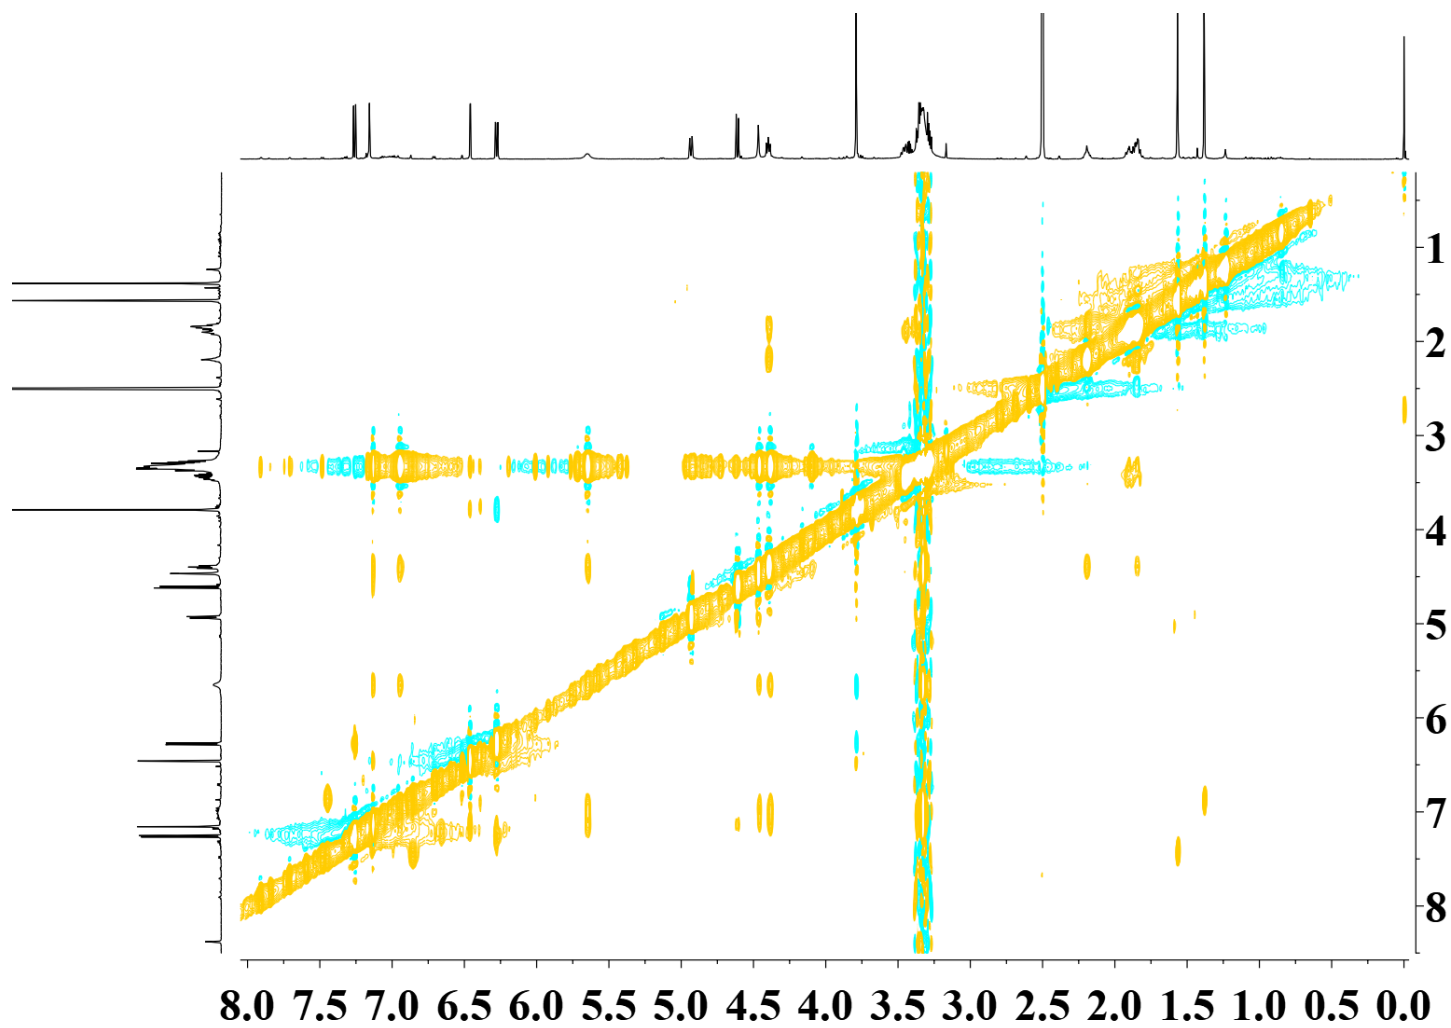

Fig. S24 NOESY spectrum of 3

T: FTMS - p ESI cv=0.00 Full ms [100.0000-1200.0000]

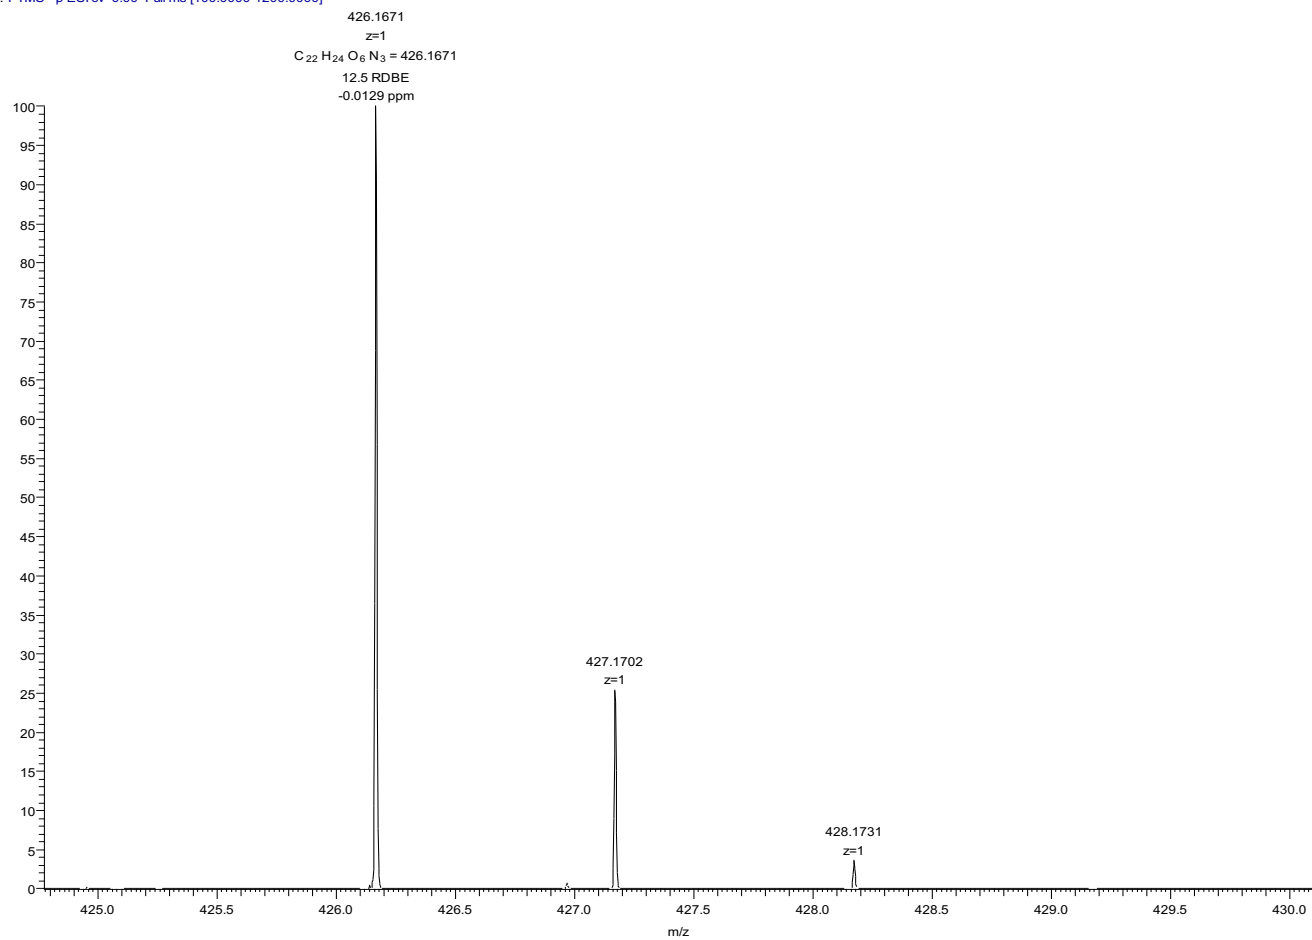

Fig. S25 HRESIMS spectrum of **3**

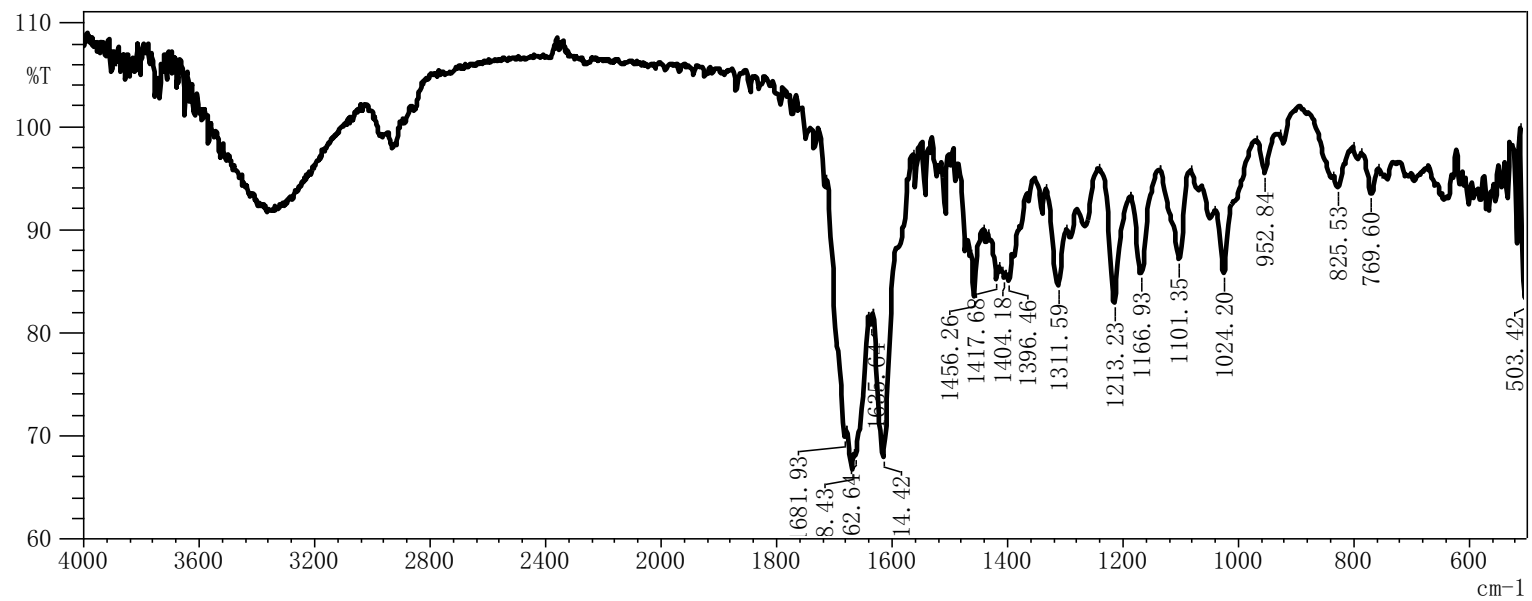

**Fig. S26** IR spectrum of **3**

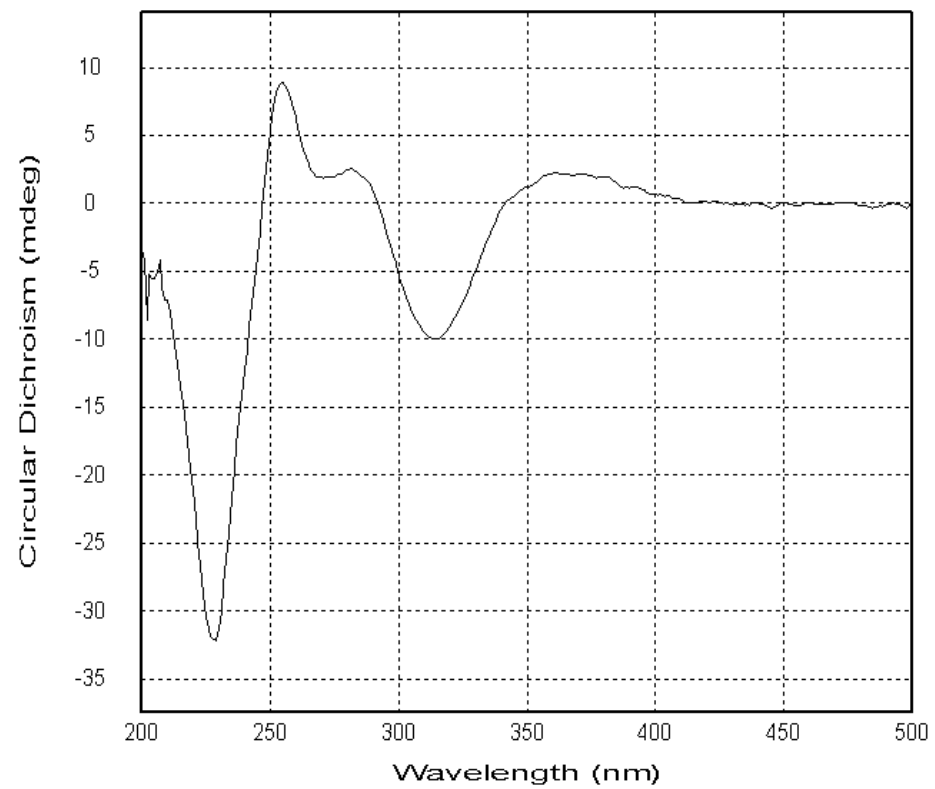

**Fig. S27** Experimental CD spectrum of **3**

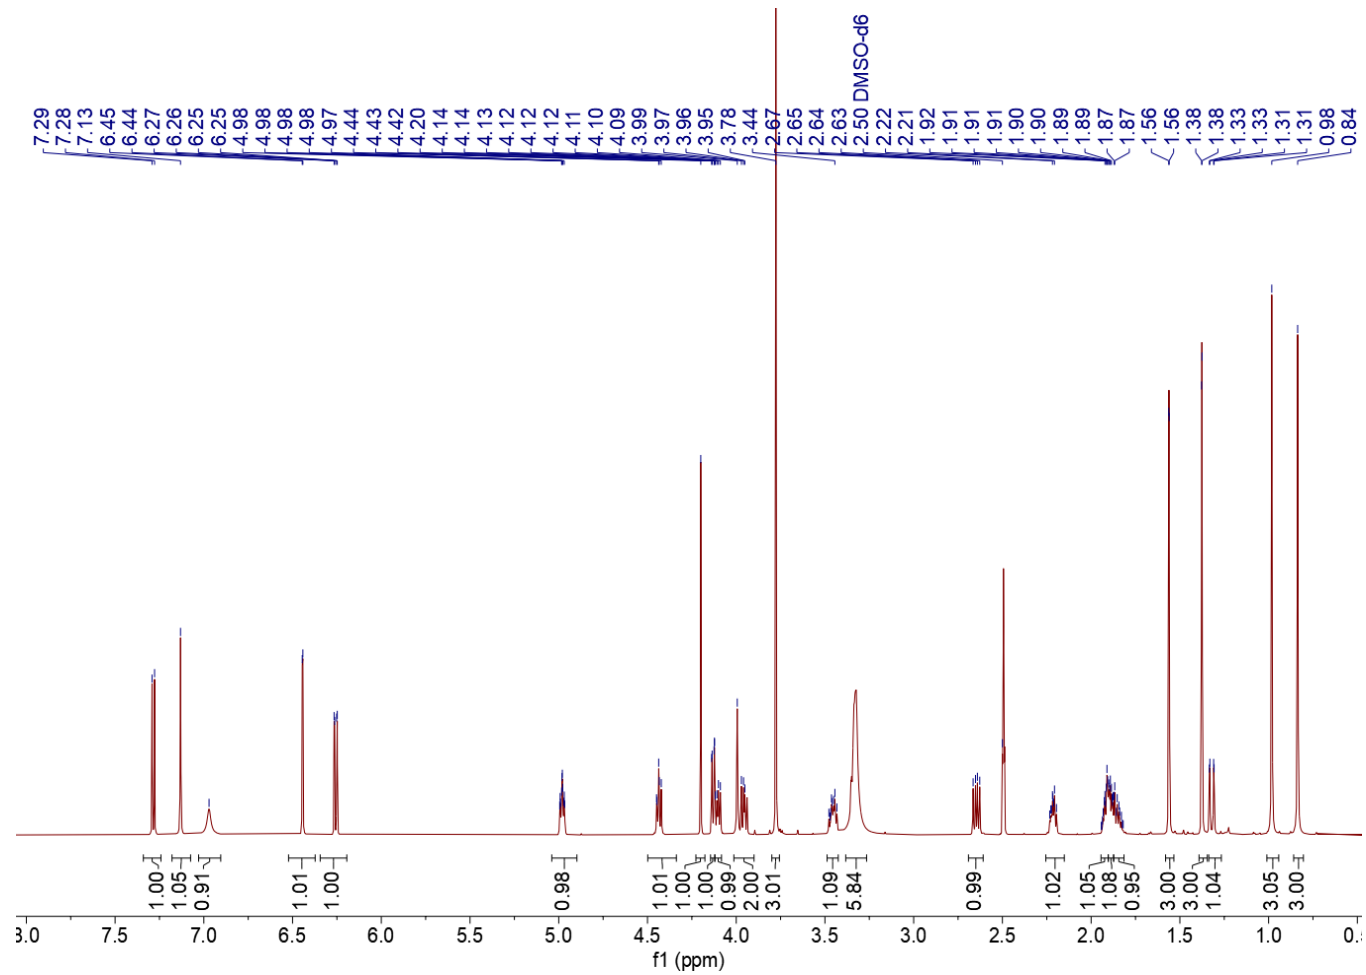

Fig. S28  $^1\text{H}$  NMR spectrum of **4**

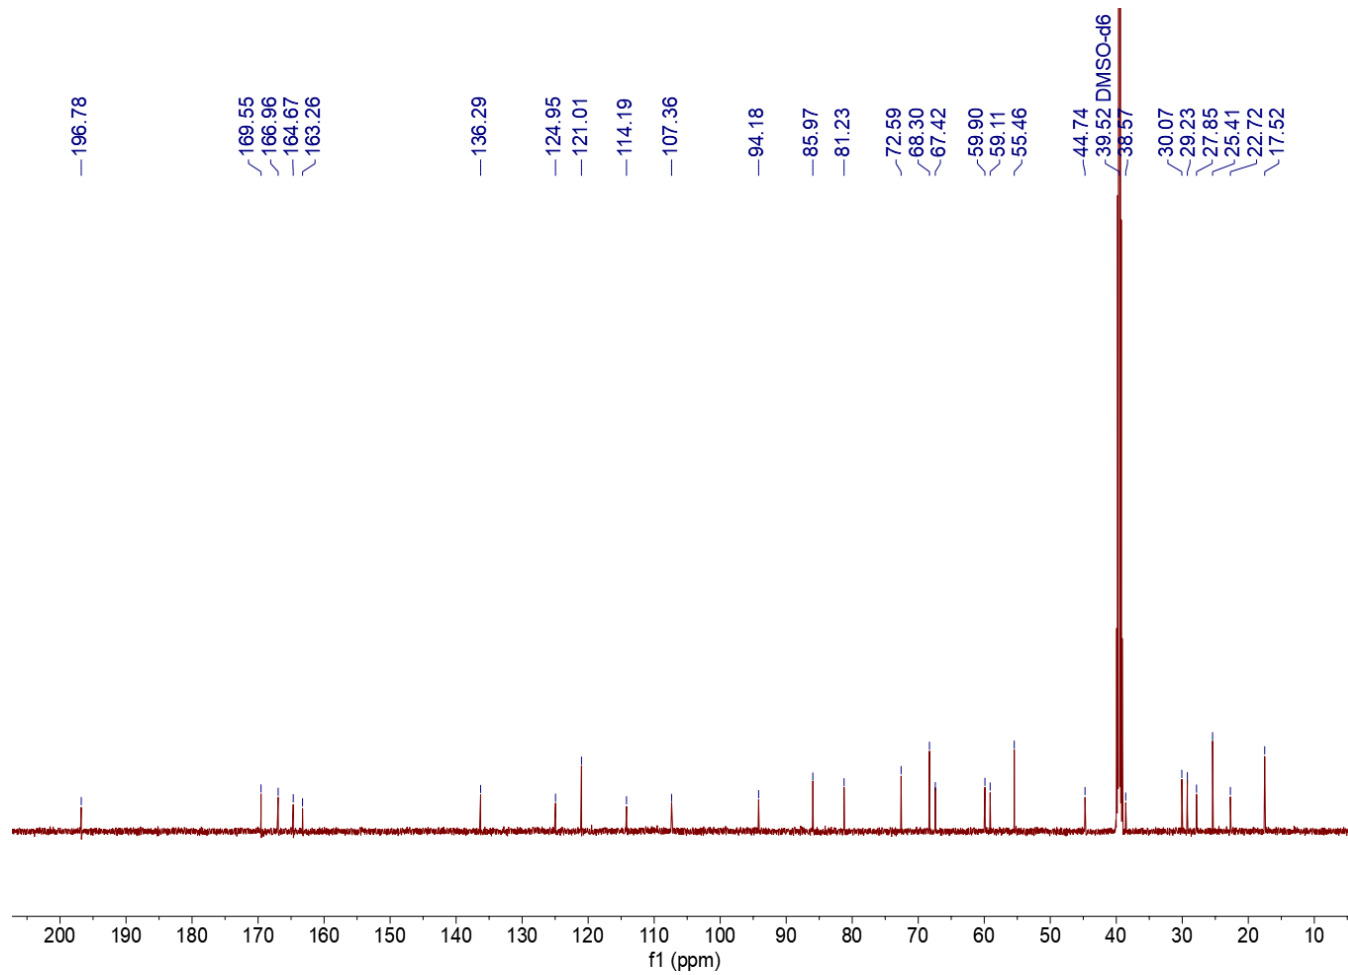

Fig. S29 <sup>13</sup>C NMR spectrum of 4



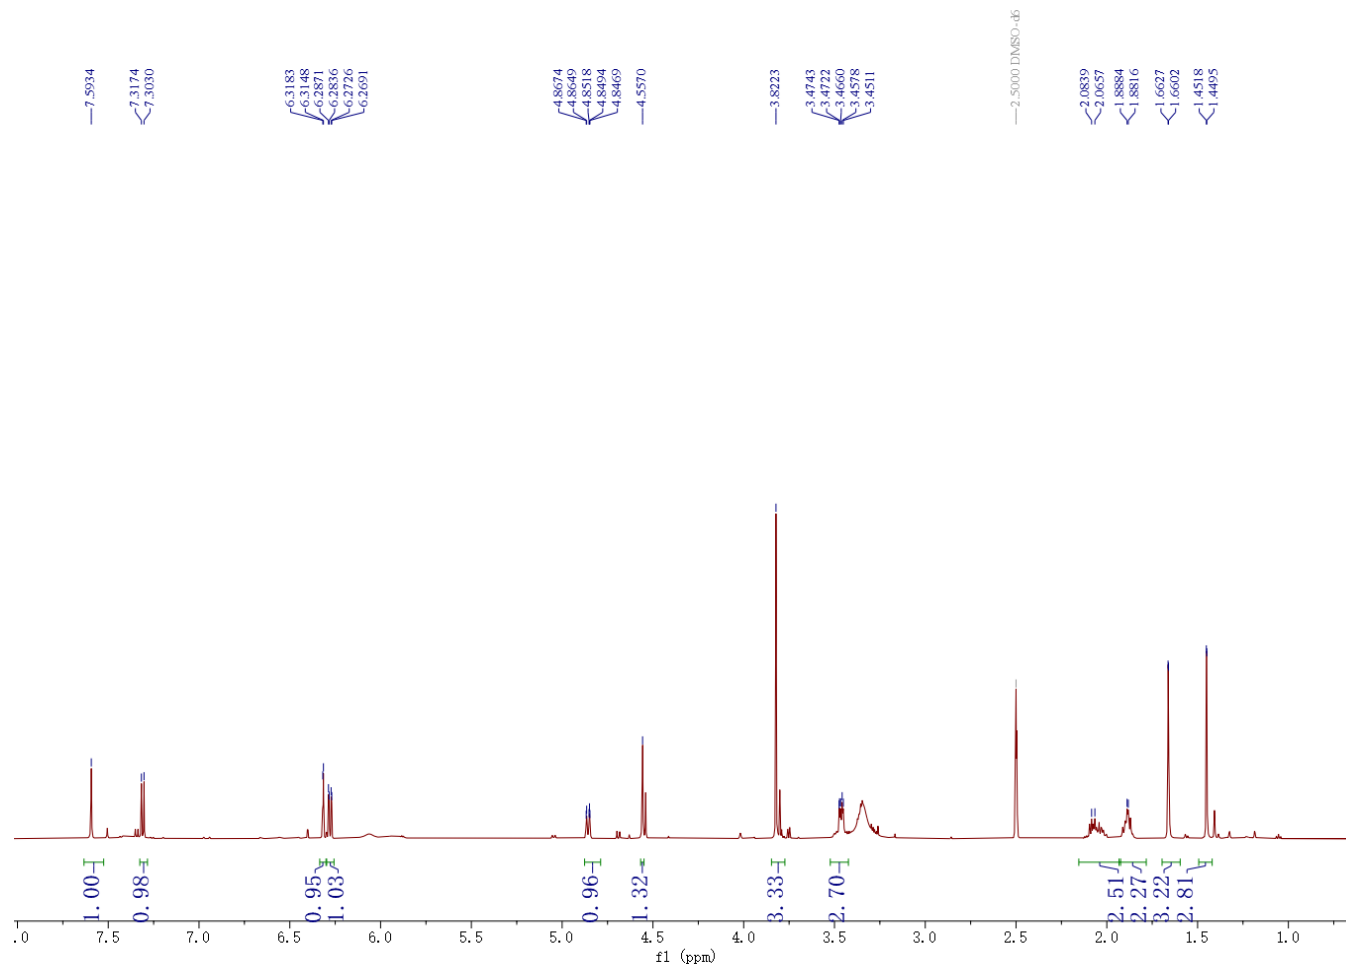

Fig. S30  $^1\text{H}$  NMR spectrum of **5**

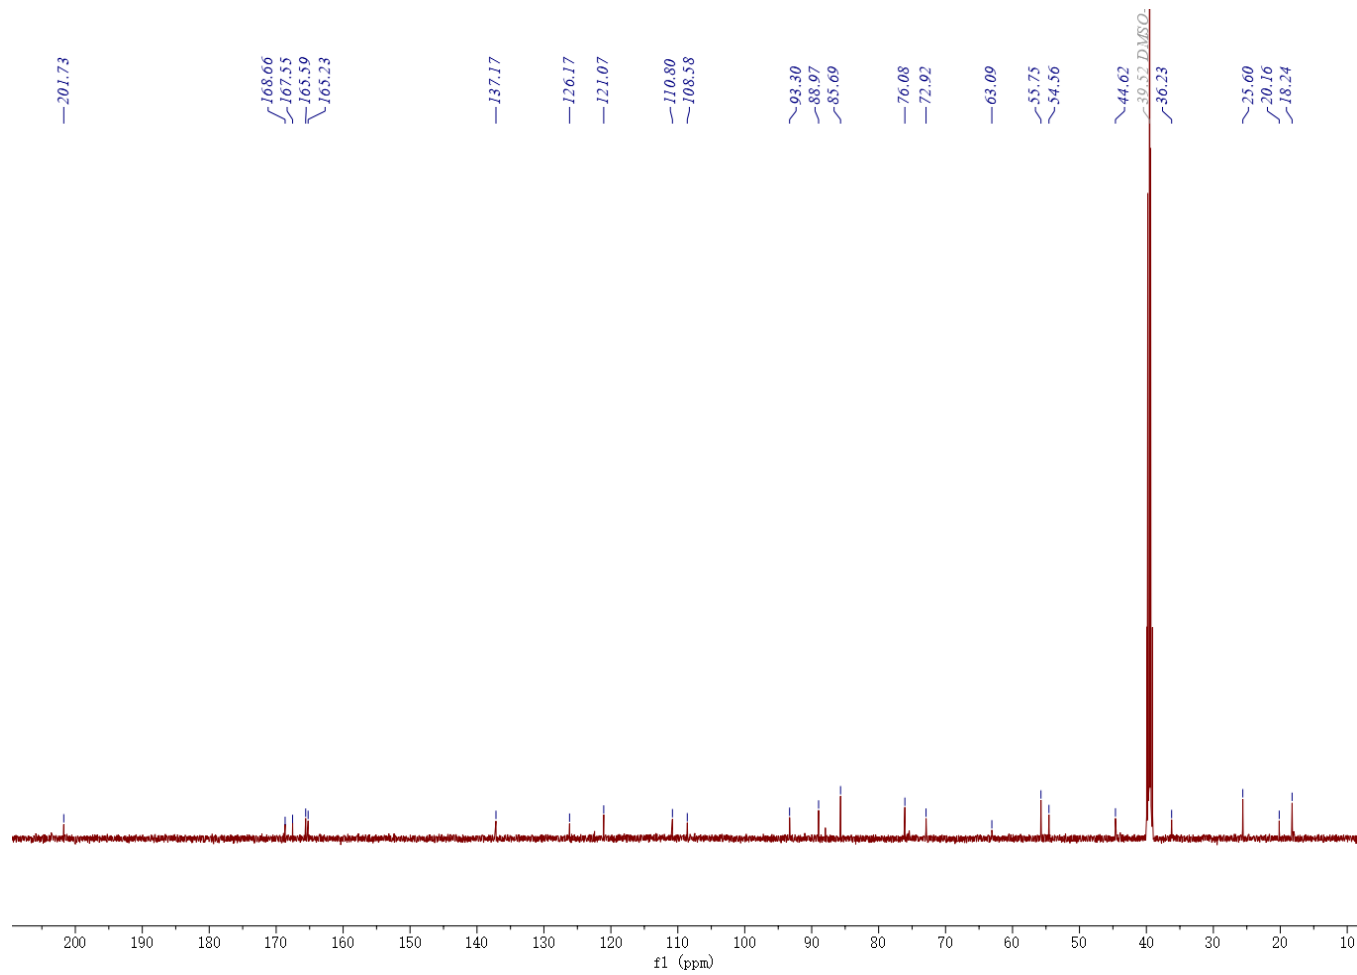

**Fig. S31** <sup>13</sup>C NMR spectrum of **5**

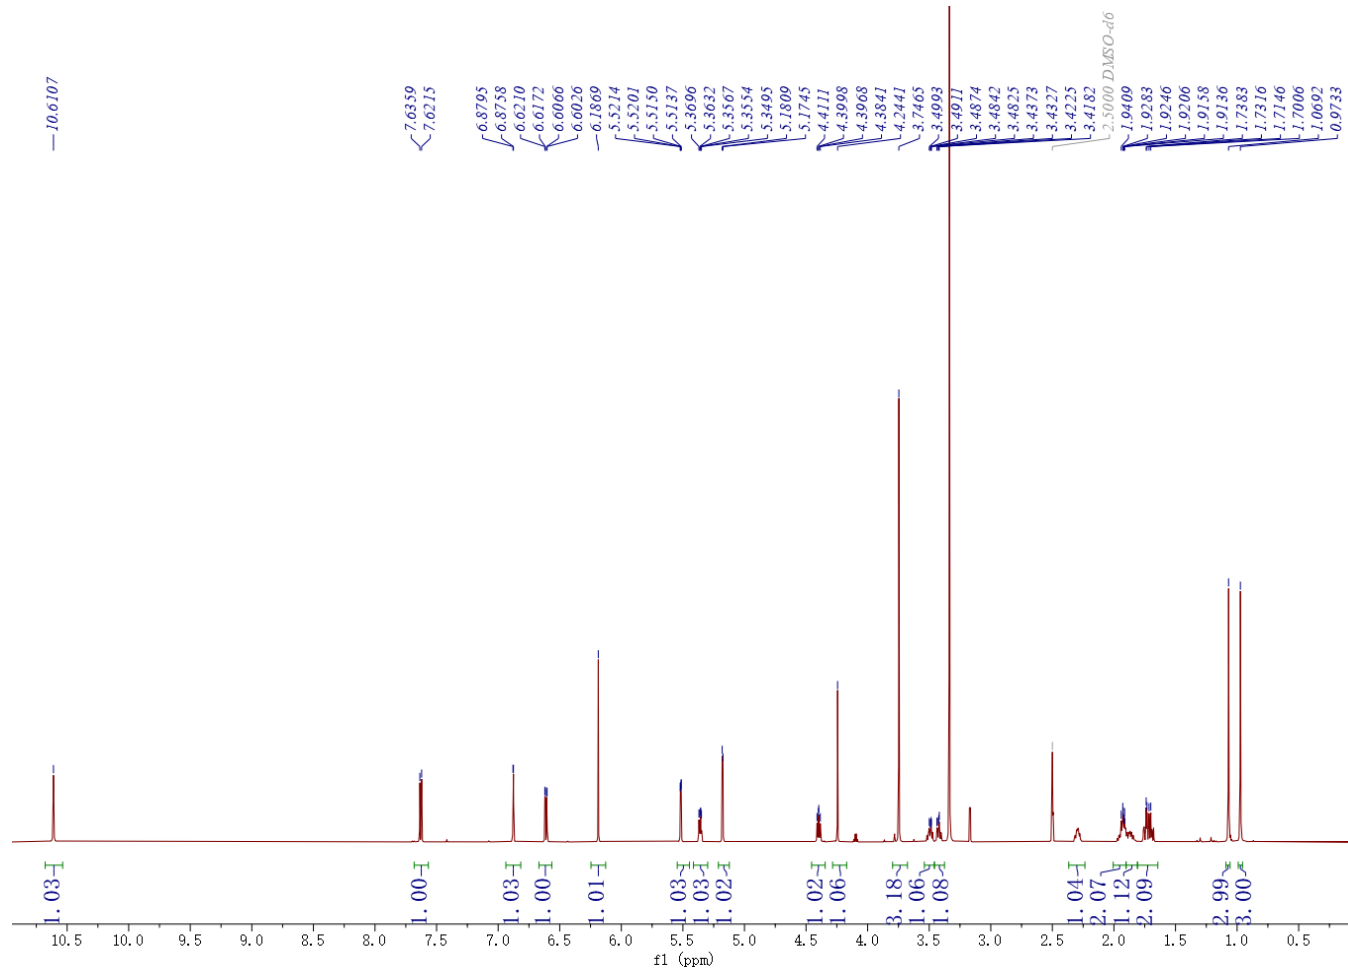

Fig. S32 <sup>1</sup>H NMR spectrum of **6**

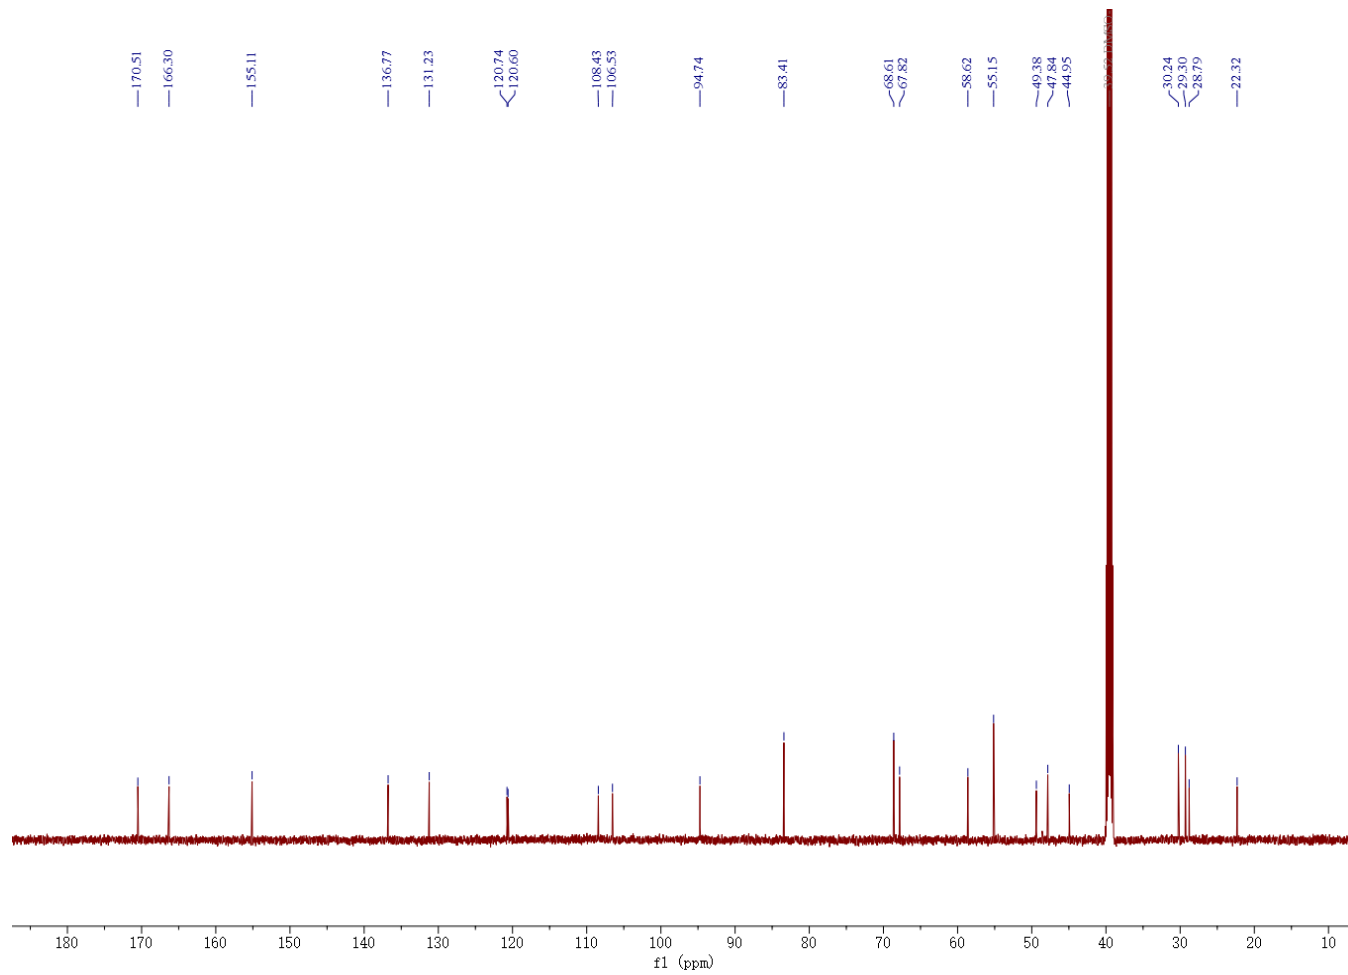

Fig. S33  $^{13}\text{C}$  NMR spectrum of **6**

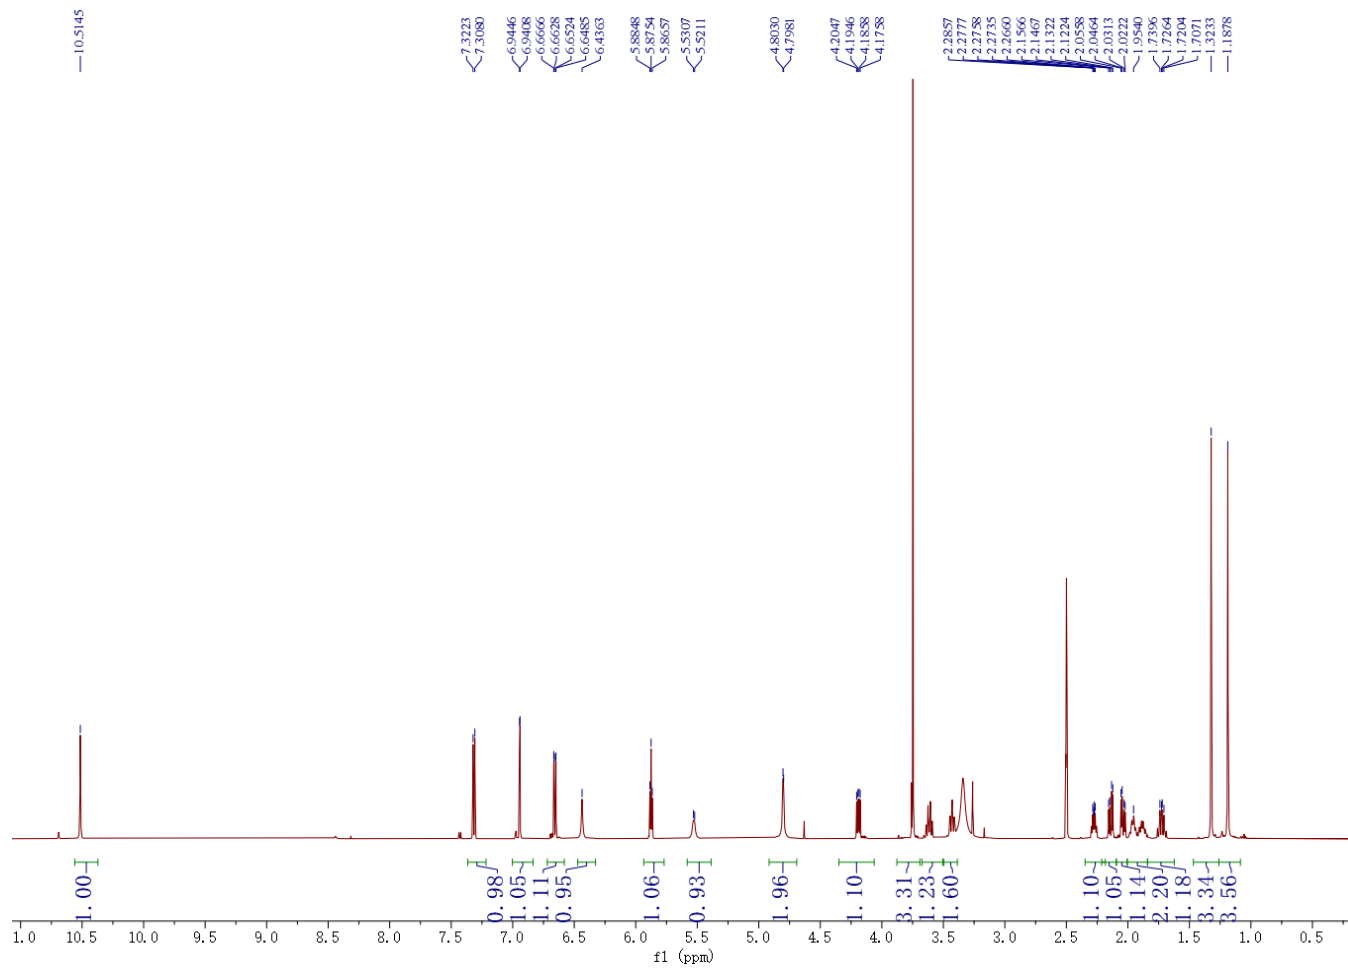

Fig. S34  $^1\text{H-NMR}$  spectrum of 7

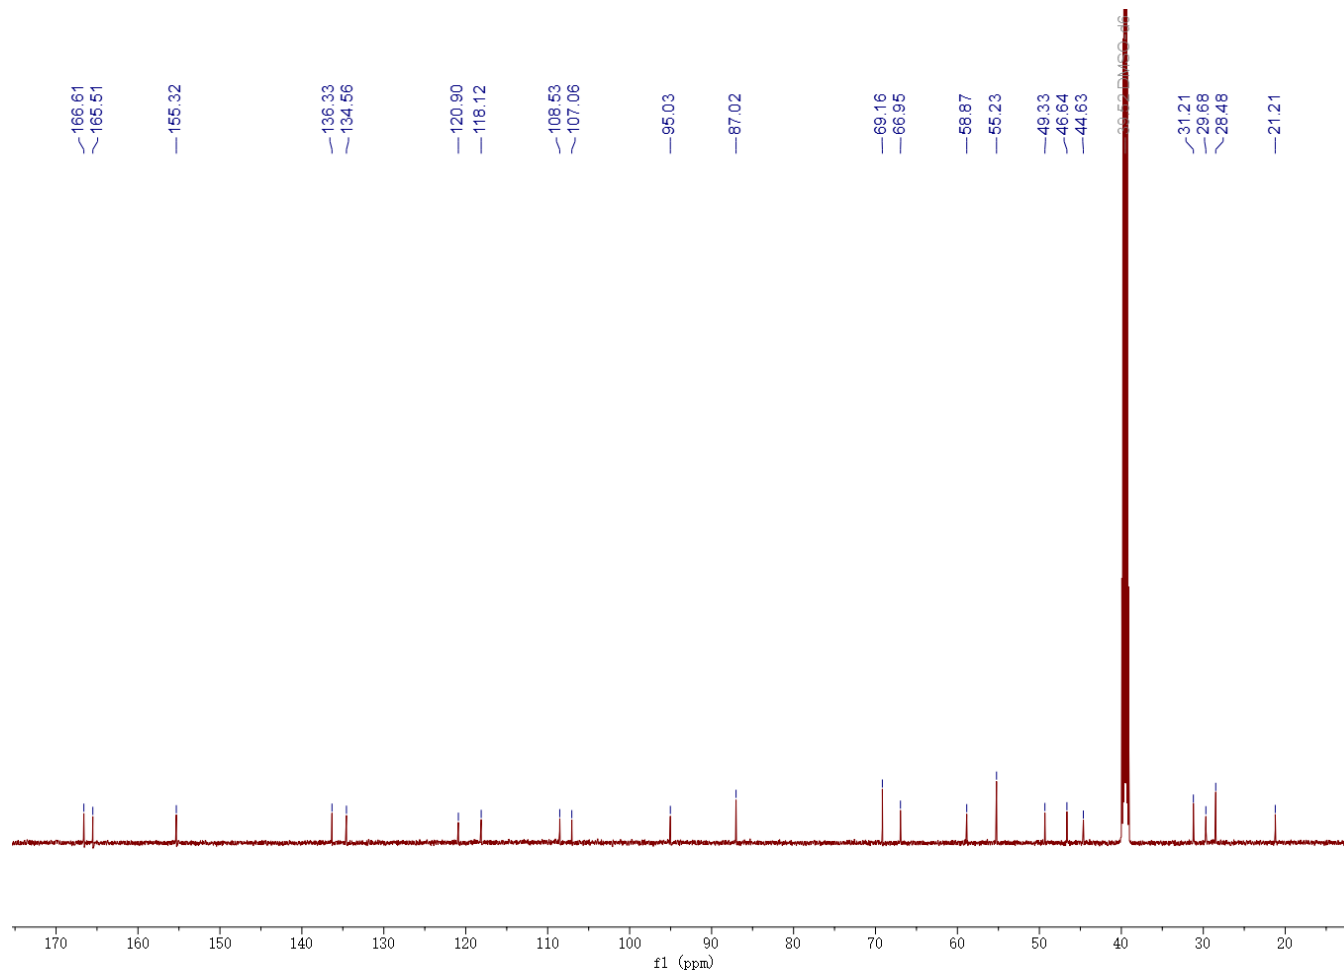

**Fig. S35**  $^{13}\text{C}$ -NMR spectrum of **7**

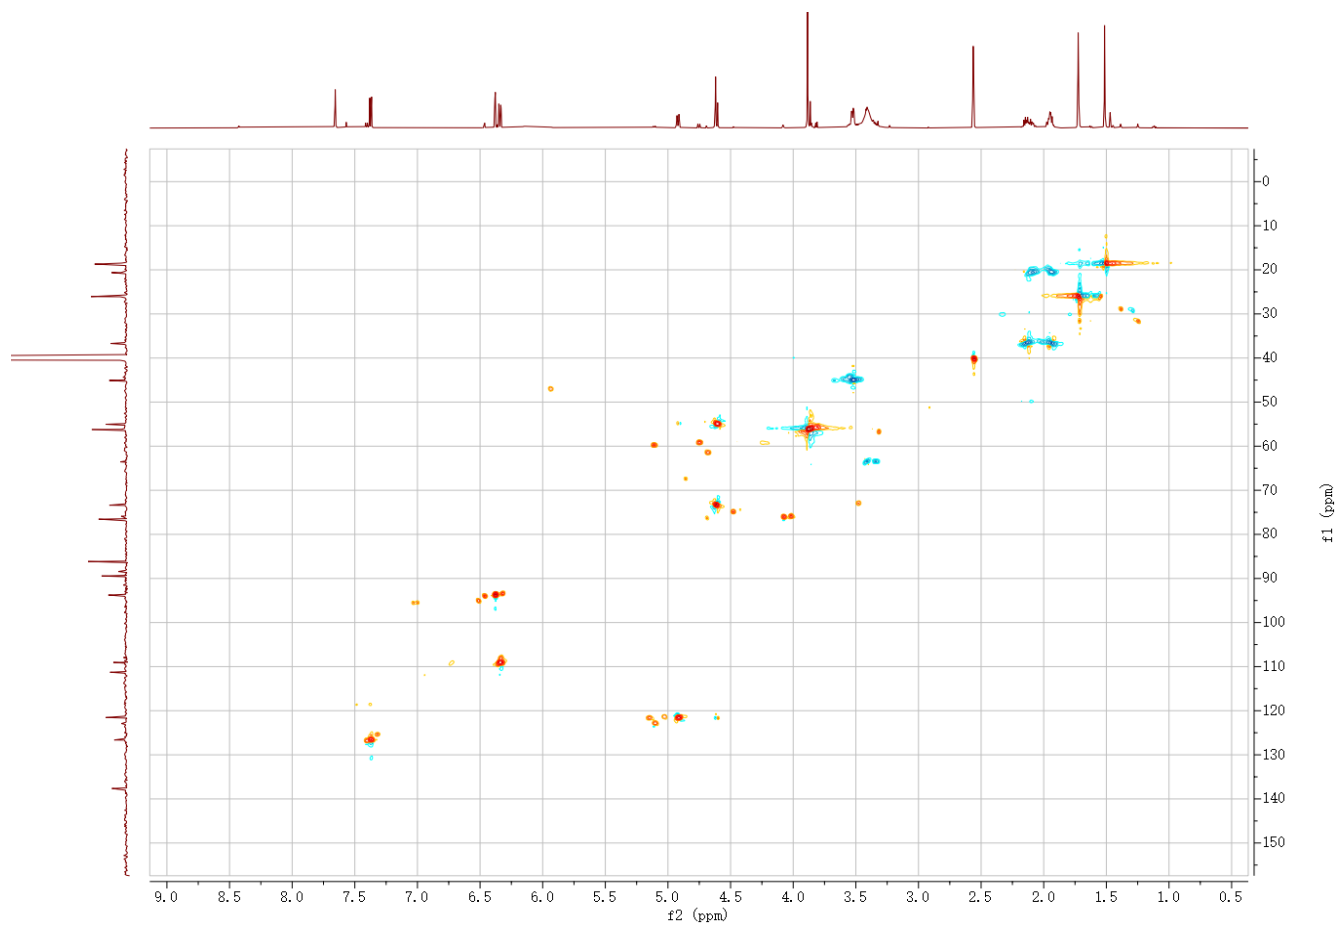

**Fig. S36** HSQC spectrum of **5**

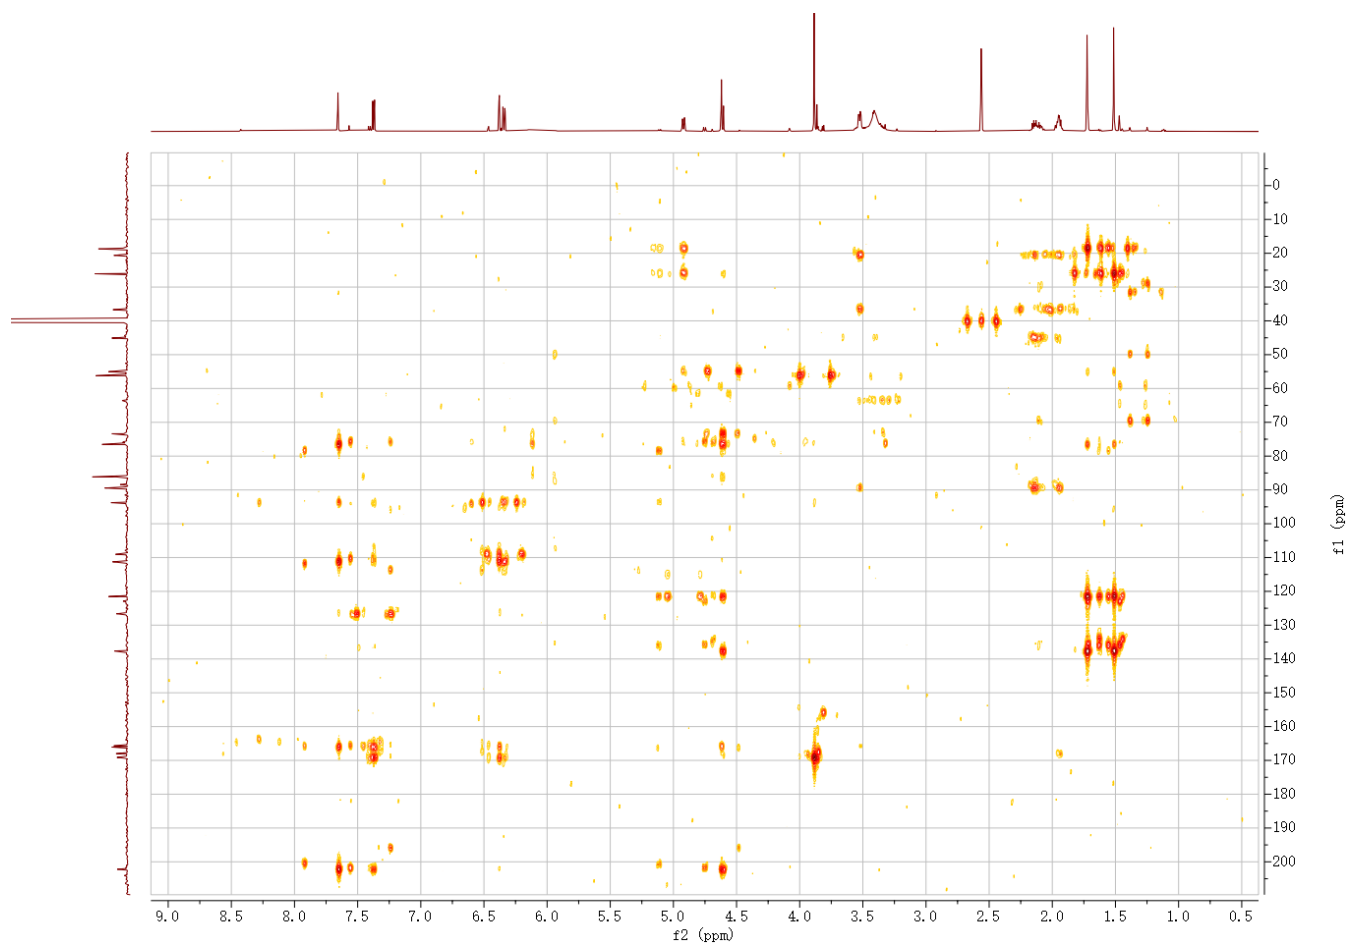

**Fig. S37** HMBC spectrum of **5**



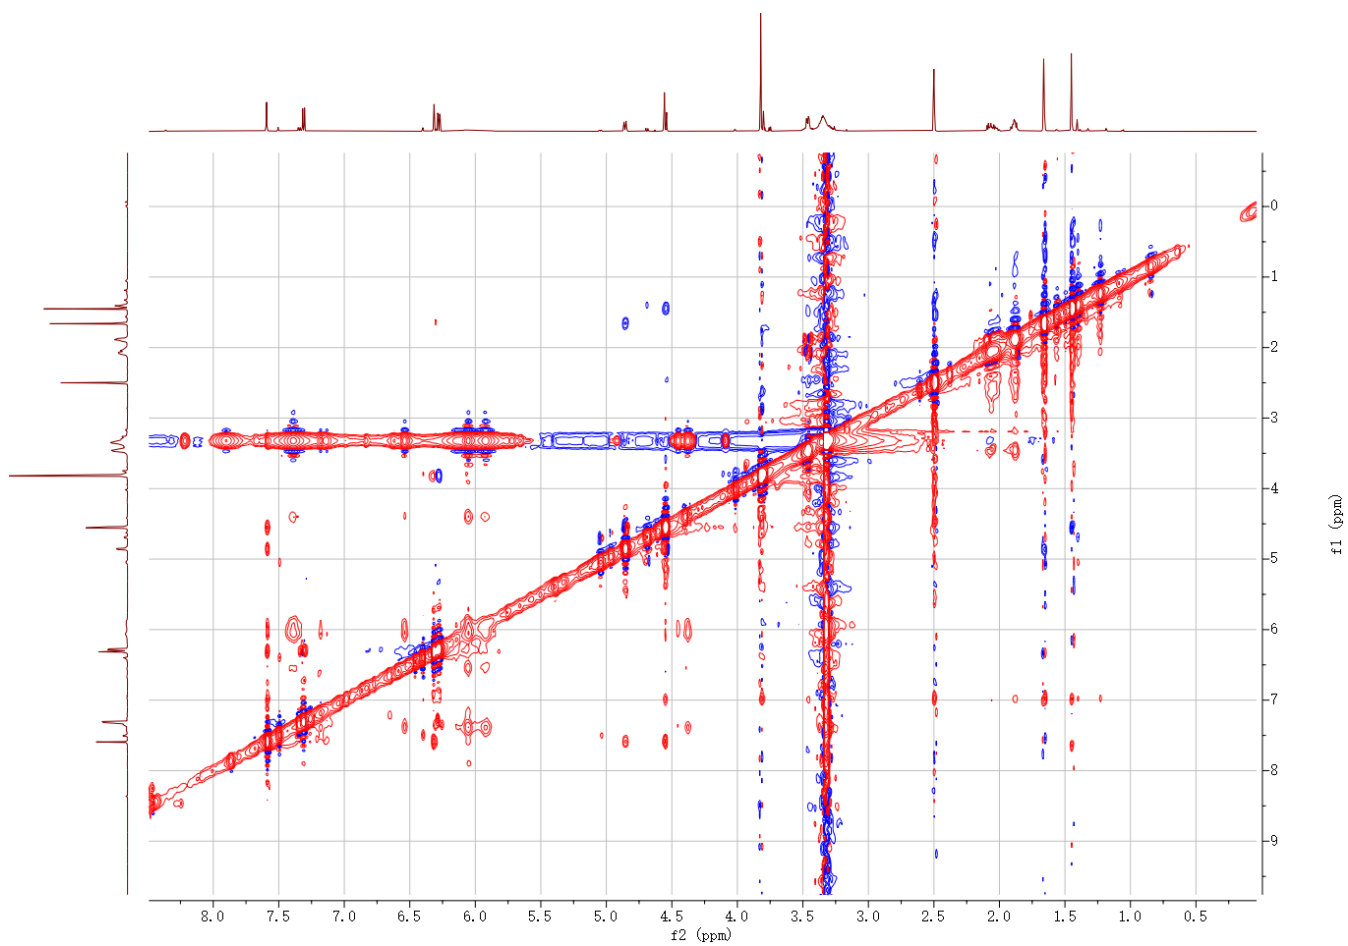

**Fig. S38** NOESY spectrum of **5**

**Table S1** DP4+ results of candidate configurations (*2R,8S,9R,12R,18S*)-**5**(Isomer 1) and (*2S,8S,9R,12R,18S*)-**5**(Isomer 2)

|    | A                | B                                                                                  | C        | D        | E           | F        | G               | H        |
|----|------------------|------------------------------------------------------------------------------------|----------|----------|-------------|----------|-----------------|----------|
| 1  | Functional       |                                                                                    | Solvent? |          | Basis Set   |          | Type of Data    |          |
| 2  | mPW1PW91         |                                                                                    | PCM      |          | 6-31+G(d,p) |          | Unscaled Shifts |          |
| 3  |                  |                                                                                    |          |          |             |          |                 |          |
| 4  |                  |                                                                                    | Isomer 1 | Isomer 2 | Isomer 3    | Isomer 4 | Isomer 5        | Isomer 6 |
| 5  | sDP4+ (H data)   | 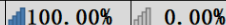 | 100.00%  | 0.00%    | –           | –        | –               | –        |
| 6  | sDP4+ (C data)   |  | 100.00%  | 0.00%    | –           | –        | –               | –        |
| 7  | sDP4+ (all data) |  | 100.00%  | 0.00%    | –           | –        | –               | –        |
| 8  | uDP4+ (H data)   |  | 100.00%  | 0.00%    | –           | –        | –               | –        |
| 9  | uDP4+ (C data)   |  | 100.00%  | 0.00%    | –           | –        | –               | –        |
| 10 | uDP4+ (all data) |  | 100.00%  | 0.00%    | –           | –        | –               | –        |
| 11 | DP4+ (H data)    |  | 100.00%  | 0.00%    | –           | –        | –               | –        |
| 12 | DP4+ (C data)    |  | 100.00%  | 0.00%    | –           | –        | –               | –        |
| 13 | DP4+ (all data)  |  | 100.00%  | 0.00%    | –           | –        | –               | –        |

**Table S2** Linear correlation coefficients ( $R^2$ ), root-mean-square deviation (RMSD) mean

absolute deviation (MAD) and corrected mean absolute deviation (CMAD) analyses of the calculated and experimental NMR data

| Candidate configurations                                          | $R^2$  | RMSD | MAD  | CMAD |
|-------------------------------------------------------------------|--------|------|------|------|
| (2 <i>R</i> ,8 <i>S</i> ,9 <i>R</i> ,12 <i>R</i> ,18 <i>S</i> )-5 | 0.9974 | 3.34 | 2.56 | 1.81 |
| (2 <i>S</i> ,8 <i>S</i> ,9 <i>R</i> ,12 <i>R</i> ,18 <i>S</i> )-5 | 0.9961 | 4.41 | 3.53 | 2.59 |

**Table S3** Energy analyses of conformers (2*R*,8*S*,9*R*,12*R*,18*S*)-5a-(2*R*,8*S*,9*R*,12*R*,18*S*)-5b

| NO.                                                                | 3D conformers                                                                        | Free energy  |                       |      |
|--------------------------------------------------------------------|--------------------------------------------------------------------------------------|--------------|-----------------------|------|
|                                                                    |                                                                                      | E (Hartree)  | $\Delta E$ (Kcal/mol) | P(%) |
| (2 <i>R</i> ,8 <i>S</i> ,9 <i>R</i> ,12 <i>R</i> ,18 <i>S</i> )-5a | 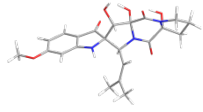 | -1544.000934 | 0.001241              | 0.21 |
| (2 <i>R</i> ,8 <i>S</i> ,9 <i>R</i> ,12 <i>R</i> ,18 <i>S</i> )-5b |  | -1544.002175 | 0                     | 0.79 |

**Table S4** Experimental <sup>13</sup>C-NMR chemical shifts and GIAO isotropic magnetic shielding values calculated for PCM/mPW1PW91/6-31+G (d, p) geometries of (2*R*,8*S*,9*R*,12*R*,18*S*)-5.

| NO.                      | Conformer<br>(2 <i>R</i> ,8 <i>S</i> ,9 <i>R</i> ,12 <i>R</i> ,18 <i>S</i> )-5a | Conformer<br>(2 <i>R</i> ,8 <i>S</i> ,9 <i>R</i> ,12 <i>R</i> ,18 <i>S</i> )-5b | Aver.     | Exptl. | Scal.calcd. |
|--------------------------|---------------------------------------------------------------------------------|---------------------------------------------------------------------------------|-----------|--------|-------------|
| C-2                      | 78.1369                                                                         | 78.1428                                                                         | 78.13985  | 76.09  | 78.14155148 |
| C-3                      | 197.9702                                                                        | 197.4394                                                                        | 197.7048  | 201.7  | 197.5517244 |
| C-3a                     | 113.0223                                                                        | 111.8037                                                                        | 112.413   | 110.81 | 112.0615721 |
| C-4                      | 127.7538                                                                        | 126.2231                                                                        | 126.98845 | 126.17 | 126.5470166 |
| C-5                      | 103.4444                                                                        | 111.1061                                                                        | 107.27525 | 108.59 | 109.4847815 |
| C-6                      | 167.0752                                                                        | 167.3638                                                                        | 167.2195  | 168.67 | 167.3027284 |
| C-7                      | 97.7841                                                                         | 92.2484                                                                         | 95.01625  | 93.31  | 94.37070141 |
| C-7a                     | 161.8923                                                                        | 163.4941                                                                        | 162.6932  | 165.6  | 163.1551376 |
| C-8                      | 76.3641                                                                         | 76.2499                                                                         | 76.307    | 72.93  | 76.27406625 |
| C-9                      | 88.7239                                                                         | 88.767                                                                          | 88.74545  | 85.69  | 88.75787946 |
| C-11                     | 165.743                                                                         | 165.738                                                                         | 165.7405  | 167.55 | 165.7390581 |
| C-12                     | 93.5127                                                                         | 93.4545                                                                         | 93.4836   | 88.98  | 92.51594283 |
| C-13                     | 37.222                                                                          | 37.1128                                                                         | 37.1674   | 36.24  | 37.13590818 |
| C-14                     | 25.0654                                                                         | 25.0355                                                                         | 25.05045  | 20.16  | 25.04182724 |
| C-15                     | 47.4237                                                                         | 47.4539                                                                         | 47.4388   | 44.63  | 47.44750928 |
| C-17                     | 164.5728                                                                        | 164.4785                                                                        | 164.52565 | 165.23 | 164.4984551 |
| C-18                     | 60.2449                                                                         | 60.2084                                                                         | 60.22665  | 54.56  | 60.21612389 |
| C-19                     | 118.9369                                                                        | 118.648                                                                         | 118.79245 | 121.07 | 118.7091351 |
| C-20                     | 146.9339                                                                        | 147.2772                                                                        | 147.10555 | 137.17 | 147.2045531 |
| C-21                     | 19.5596                                                                         | 19.3903                                                                         | 19.47495  | 18.24  | 19.42612615 |
| C-22                     | 27.2495                                                                         | 27.4411                                                                         | 27.3453   | 25.6   | 27.40055487 |
| C-23(-OCH <sub>3</sub> ) | 56.3389                                                                         | 56.2705                                                                         | 56.3047   | 55.76  | 56.28497436 |

**Table S5** Experimental <sup>1</sup>H-NMR chemical shifts and GIAO isotropic magnetic shielding values calculated for PCM/mPW1PW91/6-31+G (d, p) geometries of (2*R*,8*S*,9*R*,12*R*,18*S*)-5

| NO.                      | Conformer<br>(2 <i>R</i> ,8 <i>S</i> ,9 <i>R</i> ,12 <i>R</i> ,18 <i>S</i> )-5a | Conformer<br>(2 <i>R</i> ,8 <i>S</i> ,9 <i>R</i> ,12 <i>R</i> ,18 <i>S</i> )-5b | Aver.       | Exptl. | Scal.calcd. |
|--------------------------|---------------------------------------------------------------------------------|---------------------------------------------------------------------------------|-------------|--------|-------------|
| NH                       | 4.7833                                                                          | 4.9048                                                                          | 4.84405     | 7.59   | 4.879088971 |
| H-4                      | 8.0673                                                                          | 7.9203                                                                          | 7.9938      | 7.29   | 7.951407171 |
| H-5                      | 6.7642                                                                          | 6.7382                                                                          | 6.7512      | 6.25   | 6.743701949 |
| H-7                      | 6.6515                                                                          | 6.5917                                                                          | 6.6216      | 6.3    | 6.604354482 |
| H-8                      | 4.7183                                                                          | 4.7172                                                                          | 4.71775     | 4.54   | 4.717432775 |
| H-13                     | 2.2268                                                                          | 2.2292                                                                          | 2.228       | 2.05   | 2.228692128 |
|                          | 2.1473                                                                          | 2.155                                                                           | 2.15115     | 1.88   | 2.153370577 |
| H-14                     | 2.3749                                                                          | 2.3768                                                                          | 2.37585     | 2.01   | 2.376397935 |
|                          | 2.0626                                                                          | 2.062                                                                           | 2.0623      | 1.81   | 2.062126968 |
| H-15                     | 3.828                                                                           | 3.8206                                                                          | 3.8243      | 3.45   | 3.822165939 |
|                          | 3.5105                                                                          | 3.5082                                                                          | 3.50935     | 3.45   | 3.508686711 |
| H-18                     | 4.8028                                                                          | 4.8219                                                                          | 4.81235     | 4.53   | 4.817858184 |
| H-19                     | 5.1159                                                                          | 5.129                                                                           | 5.12245     | 4.83   | 5.126227864 |
| H-21                     | 1.570633333                                                                     | 1.5761                                                                          | 1.573366667 | 1.43   | 1.57494318  |
| H-22                     | 1.860233333                                                                     | 1.866166667                                                                     | 1.8632      | 1.65   | 1.864911094 |
| H-23(-OCH <sub>3</sub> ) | 3.9967                                                                          | 4.009066667                                                                     | 4.002883333 | 3.81   | 4.006449714 |
| 8-OH                     | 2.4266                                                                          | 2.4646                                                                          | 2.4456      | 5.04   | 2.45655869  |
| 9-OH                     | 8.9038                                                                          | 8.9816                                                                          | 8.9427      | 7.48   | 8.965136477 |
| 12-OH                    | 5.7941                                                                          | 5.8072                                                                          | 5.80065     | 6.43   | 5.804427864 |

**Table S6** Energy analyses of conformers (2*S*,8*S*,9*R*,12*R*,18*S*)-5a-(2*S*,8*S*,9*R*,12*R*,18*S*)-5h

| NO.                                                                | 3D conformers                                                                       | Free energy  |                       |       |
|--------------------------------------------------------------------|-------------------------------------------------------------------------------------|--------------|-----------------------|-------|
|                                                                    |                                                                                     | E (Hartree)  | $\Delta E$ (Kcal/mol) | P(%)  |
| (2 <i>S</i> ,8 <i>S</i> ,9 <i>R</i> ,12 <i>R</i> ,18 <i>S</i> )-5a | 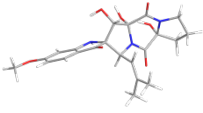   | -1543.991711 | 0.002125              | 4.39  |
| (2 <i>S</i> ,8 <i>S</i> ,9 <i>R</i> ,12 <i>R</i> ,18 <i>S</i> )-5b |    | -1543.992647 | 0.001189              | 11.85 |
| (2 <i>S</i> ,8 <i>S</i> ,9 <i>R</i> ,12 <i>R</i> ,18 <i>S</i> )-5c |    | -1543.992582 | 0.001254              | 11.07 |
| (2 <i>S</i> ,8 <i>S</i> ,9 <i>R</i> ,12 <i>R</i> ,18 <i>S</i> )-5d |    | -1543.993395 | 0.000441              | 26.20 |
| (2 <i>S</i> ,8 <i>S</i> ,9 <i>R</i> ,12 <i>R</i> ,18 <i>S</i> )-5e |    | -1543.987618 | 0.006218              | 0.06  |
| (2 <i>S</i> ,8 <i>S</i> ,9 <i>R</i> ,12 <i>R</i> ,18 <i>S</i> )-5f |   | -1543.988628 | 0.005208              | 0.17  |
| (2 <i>S</i> ,8 <i>S</i> ,9 <i>R</i> ,12 <i>R</i> ,18 <i>S</i> )-5g |  | -1543.993836 | 0                     | 41.81 |
| (2 <i>S</i> ,8 <i>S</i> ,9 <i>R</i> ,12 <i>R</i> ,18 <i>S</i> )-5h |  | -1543.991722 | 0.002114              | 4.45  |

**Table S7** Experimental  $^{13}\text{C}$ -NMR chemical shifts and GIAO isotropic magnetic shielding values calculated for PCM/mPW1PW91/6-31+G (d, p) geometries of (2*S*,8*S*,9*R*,12*R*,18*S*)-5

| NO.                      | Conformer<br>2 <i>S</i> -5a | Conformer<br>2 <i>S</i> -5b | Conformer<br>2 <i>S</i> -5c | Conformer<br>2 <i>S</i> -5d | Conformer<br>2 <i>S</i> -5e | Conformer<br>2 <i>S</i> -5f | Conformer<br>2 <i>S</i> -5g | Conformer<br>2 <i>S</i> -5h | Aver.       | Exptl.    | Scal.calcd. |
|--------------------------|-----------------------------|-----------------------------|-----------------------------|-----------------------------|-----------------------------|-----------------------------|-----------------------------|-----------------------------|-------------|-----------|-------------|
| C-2                      | 80.083                      | 79.6199                     | 80.5638                     | 79.9895                     | 79.8094                     | 80.1151                     | 80.3866                     | 77.6002                     | 79.7709375  | 78.13985  | 80.07317804 |
| C-3                      | 191.431                     | 190.945                     | 192.0425                    | 191.4192                    | 192.2517                    | 191.5322                    | 191.3156                    | 190.9033                    | 191.4800625 | 197.7048  | 191.3668835 |
| C-3a                     | 114.4092                    | 113.6745                    | 114.2006                    | 113.1925                    | 114.1406                    | 113.2806                    | 114.3534                    | 112.5969                    | 113.7310375 | 112.413   | 113.8742533 |
| C-4                      | 125.9256                    | 125.0309                    | 125.7679                    | 124.4192                    | 125.7804                    | 124.5908                    | 126.1503                    | 124.503                     | 125.2710125 | 126.98845 | 125.4357494 |
| C-5                      | 103.3638                    | 110.6835                    | 101.61                      | 108.9525                    | 103.3109                    | 111.1758                    | 103.3587                    | 108.6839                    | 106.3923875 | 107.27525 | 105.7493151 |
| C-6                      | 165.5914                    | 165.9325                    | 165.4665                    | 165.7272                    | 165.5916                    | 165.8571                    | 165.6445                    | 165.8539                    | 165.7080875 | 167.2195  | 165.6879199 |
| C-7                      | 99.4787                     | 93.5735                     | 97.6102                     | 91.5841                     | 99.3738                     | 92.8823                     | 99.5202                     | 90.0756                     | 95.5123     | 95.01625  | 96.09142424 |
| C-7a                     | 158.7956                    | 160.6179                    | 158.646                     | 160.5666                    | 158.8883                    | 160.9896                    | 158.6931                    | 160.4881                    | 159.71065   | 162.6932  | 159.4952493 |
| C-8                      | 75.2632                     | 75.4682                     | 76.9467                     | 77.2453                     | 75.8892                     | 76.0643                     | 75.109                      | 77.5974                     | 76.1979125  | 76.307    | 76.03417729 |
| C-9                      | 88.0818                     | 88.1258                     | 88.1516                     | 88.018                      | 88.0473                     | 88.1183                     | 88.5391                     | 87.506                      | 88.0734875  | 88.74545  | 88.24363508 |
| C-11                     | 165.311                     | 165.2024                    | 164.4259                    | 164.1554                    | 166.4319                    | 166.4936                    | 165.8277                    | 164.8323                    | 165.335025  | 165.7405  | 165.0947639 |
| C-12                     | 94.2506                     | 94.1966                     | 93.2764                     | 93.3593                     | 92.3073                     | 92.2073                     | 93.3239                     | 94.3107                     | 93.4040125  | 93.4836   | 93.51358699 |
| C-13                     | 38.2109                     | 38.1402                     | 38.236                      | 38.1033                     | 39.8671                     | 39.9293                     | 37.6764                     | 37.7509                     | 38.4892625  | 37.1674   | 37.93701762 |
| C-14                     | 26.8841                     | 26.8895                     | 24.1969                     | 24.2335                     | 23.4374                     | 23.4383                     | 24.8904                     | 27.0293                     | 25.124925   | 25.05045  | 25.05813847 |
| C-15                     | 47.524                      | 47.517                      | 48.2448                     | 48.3317                     | 48.2418                     | 48.1145                     | 47.777                      | 47.3602                     | 47.888875   | 47.4388   | 47.91443137 |
| C-17                     | 163.4036                    | 163.5382                    | 163.9476                    | 163.9539                    | 163.8206                    | 163.8071                    | 163.3476                    | 163.6667                    | 163.6856625 | 164.52565 | 163.6131435 |
| C-18                     | 66.4749                     | 66.351                      | 64.7065                     | 64.3855                     | 65.8536                     | 65.8893                     | 66.1979                     | 67.7819                     | 65.955075   | 60.22665  | 65.65811168 |
| C-19                     | 117.644                     | 117.5689                    | 118.47                      | 117.6682                    | 118.3048                    | 118.4984                    | 118.3798                    | 118.3404                    | 118.1093125 | 118.79245 | 118.0732592 |
| C-20                     | 141.4412                    | 141.4687                    | 140.4569                    | 141.1208                    | 140.7135                    | 141.0332                    | 140.8998                    | 140.6169                    | 140.968875  | 147.10555 | 140.9874701 |
| C-21                     | 19.0649                     | 18.9782                     | 19.008                      | 18.9184                     | 19.0659                     | 19.0574                     | 19.0059                     | 19.1997                     | 19.0373     | 19.47495  | 18.99126156 |
| C-22                     | 27.308                      | 27.3462                     | 27.3441                     | 27.3115                     | 27.2299                     | 27.3474                     | 27.3022                     | 27.418                      | 27.3259125  | 27.3453   | 27.31993178 |
| C-23(-OCH <sub>3</sub> ) | 56.2287                     | 56.027                      | 56.0296                     | 55.865                      | 56.1116                     | 56.0986                     | 56.2065                     | 55.902                      | 56.058625   | 56.3047   | 56.06336669 |

**Table S8** Experimental <sup>1</sup>H-NMR chemical shifts and GIAO isotropic magnetic shielding values calculated for PCM/mPW1PW91/6-31+G (d, p) geometries of (2*S*,8*S*,9*R*,12*R*,18*S*)-5

| NO.                      | Conformer<br>2 <i>S</i> -5a | Conformer<br>2 <i>S</i> -5b | Conformer<br>2 <i>S</i> -5c | Conformer<br>2 <i>S</i> -5d | Conformer<br>2 <i>S</i> -5e | Conformer<br>2 <i>S</i> -5f | Conformer<br>2 <i>S</i> -5g | Conformer<br>2 <i>S</i> -5h | Aver.       | Exptl. | Scal.calcd. |
|--------------------------|-----------------------------|-----------------------------|-----------------------------|-----------------------------|-----------------------------|-----------------------------|-----------------------------|-----------------------------|-------------|--------|-------------|
| NH                       | 4.5928                      | 4.7156                      | 4.959                       | 5.1059                      | 4.5943                      | 4.7491                      | 4.5975                      | 6.0498                      | 4.9205      | 7.59   | 4.849356545 |
| H-4                      | 8.038                       | 7.8845                      | 7.9776                      | 7.846                       | 8.0072                      | 7.8735                      | 8.0274                      | 7.8543                      | 7.9385625   | 7.29   | 7.949917579 |
| H-5                      | 6.8337                      | 6.8148                      | 6.7322                      | 6.6676                      | 6.7837                      | 6.7494                      | 6.8431                      | 6.613                       | 6.7546875   | 6.25   | 6.770652285 |
| H-7                      | 6.8224                      | 6.7735                      | 6.7074                      | 6.621                       | 6.8277                      | 6.7951                      | 6.8267                      | 6.5408                      | 6.739325    | 6.3    | 6.740339073 |
| H-8                      | 5.0111                      | 5.0294                      | 4.8369                      | 4.8762                      | 4.8916                      | 4.9332                      | 4.9801                      | 4.9269                      | 4.935675    | 4.54   | 4.941743951 |
| H-13                     | 3.0351                      | 3.0468                      | 2.225                       | 2.2442                      | 1.9719                      | 1.998                       | 2.0935                      | 3.0621                      | 2.459575    | 2.05   | 2.344831896 |
|                          | 2.1363                      | 2.1341                      | 2.1878                      | 2.2153                      | 2.1456                      | 2.1631                      | 2.2165                      | 2.1346                      | 2.1666625   | 1.88   | 2.195938684 |
| H-14                     | 1.9477                      | 1.9577                      | 2.3373                      | 2.3484                      | 2.347                       | 2.3536                      | 2.3628                      | 1.9973                      | 2.206475    | 2.01   | 2.273634986 |
|                          | 1.7217                      | 1.737                       | 2.0641                      | 2.0742                      | 1.9991                      | 2.0117                      | 2.034                       | 1.7997                      | 1.9301875   | 1.81   | 1.988434258 |
| H-15                     | 4.0241                      | 4.0252                      | 3.5468                      | 3.5772                      | 3.6387                      | 3.6652                      | 3.5253                      | 3.9792                      | 3.7477125   | 3.45   | 3.642975128 |
|                          | 3.545                       | 3.5743                      | 3.8053                      | 3.8311                      | 3.6674                      | 3.6911                      | 3.7691                      | 3.5949                      | 3.684775    | 3.45   | 3.748458742 |
| H-18                     | 4.909                       | 4.9433                      | 4.7646                      | 4.7915                      | 4.8992                      | 4.9381                      | 4.8965                      | 4.9886                      | 4.89135     | 4.53   | 4.864661152 |
| H-19                     | 5.4373                      | 5.4597                      | 5.4605                      | 5.5583                      | 5.4818                      | 5.5052                      | 5.409                       | 5.4735                      | 5.4731625   | 4.83   | 5.464141542 |
| H-21                     | 1.593966667                 | 1.597833333                 | 1.560366667                 | 1.597166667                 | 1.6058                      | 1.5793                      | 1.559066667                 | 1.679866667                 | 1.596670833 | 1.65   | 1.58075786  |
| H-22                     | 1.716133333                 | 1.7132                      | 1.728766667                 | 1.722433333                 | 1.699333333                 | 1.7116                      | 1.7231                      | 1.787633333                 | 1.725275    | 1.43   | 1.724910291 |
| H-23(-OCH <sub>3</sub> ) | 4.000733333                 | 4.013966667                 | 3.9851                      | 3.9838                      | 3.993866667                 | 4.0131                      | 4.0037                      | 3.9722                      | 3.995808333 | 3.81   | 3.996123686 |
| 8-OH                     | 3.7957                      | 3.6998                      | 3.1043                      | 3.0506                      | 3.8642                      | 3.8251                      | 3.8011                      | 2.5254                      | 3.458275    | 5.04   | 3.458441098 |
| 9-OH                     | 4.1003                      | 4.0631                      | 6.0839                      | 6.1677                      | 3.8851                      | 3.8887                      | 4.1072                      | 4.5285                      | 4.6030625   | 7.48   | 4.878498872 |
| 12-OH                    | 5.4267                      | 5.4591                      | 2.7672                      | 2.8104                      | 2.2161                      | 2.219                       | 5.1201                      | 5.0961                      | 3.8893375   | 6.43   | 4.30067574  |
